# Supplementary material for: Copper-Catalyzed Synthesis of Unsymmetrical Diorganyl Chalcogenides (Te/Se/S) from Boronic Acids under Solvent-Free Conditions ‡
Source: PubMed Central journal article supplement (PMC6152410; doi:10.3390/molecules22081367), 2017-08-18

## Supplementary material

### **Copper-catalyzed synthesis of unsymmetrical diorganyl chalcogenides (Te/Se/S) from boronic acids under solvent-free conditions**

**Sumbal Saba <sup>1,2</sup>, Giancarlo V. Botteselle <sup>3</sup>, Marcelo Godoi <sup>4</sup>, Tiago E. A. Frizon <sup>5</sup>, Fábio Z. Galetto <sup>1</sup>, Jamal Rafique <sup>1,\*</sup> and Antonio L. Braga <sup>1,\*</sup>**

<sup>1</sup> Departamento de Química, Universidade Federal de Santa Catarina, UFSC, Florianópolis 88040-900, SC, Brazil

<sup>2</sup> Department of chemistry, Shaheed Benazir Bhutto Women University, Peshawar, 25000, KPK, Pakistan

<sup>3</sup> Laboratório de Pesquisa Química, CECE, Universidade Estadual do Oeste do Paraná UNIOESTE, 85819-110, PR, Brazil

<sup>4</sup> Escola de Química e Alimentos, Universidade Federal do Rio Grande-Campus Santo Antônio da Patrulha, RS, Brazil

<sup>5</sup> Universidade Federal de Santa Catarina, UFSC, Campus Araranguá, 88905-120, SC, Brazil

\*E-mail: [jamal.chm@gmail.com](mailto:jamal.chm@gmail.com) (J.R.); [braga.antonio@ufsc.br](mailto:braga.antonio@ufsc.br) (A.L.B.)

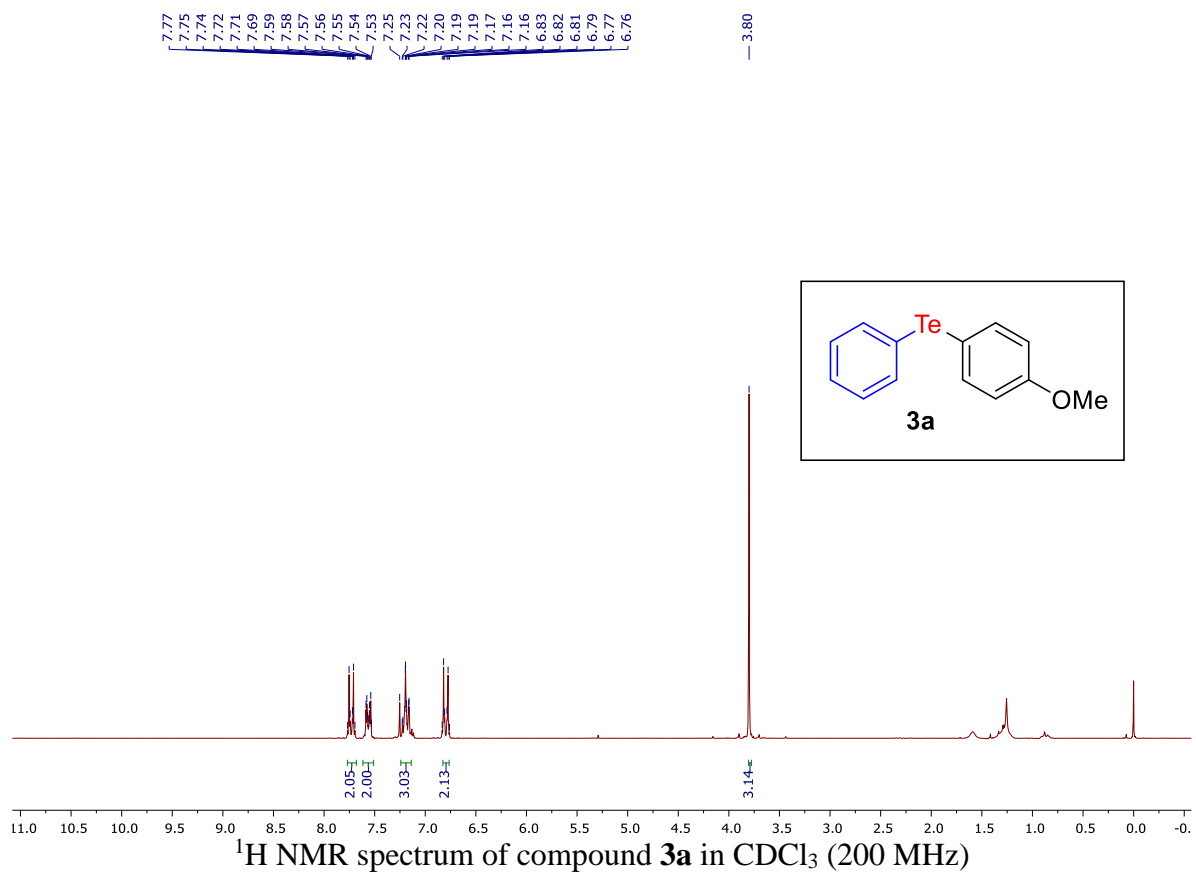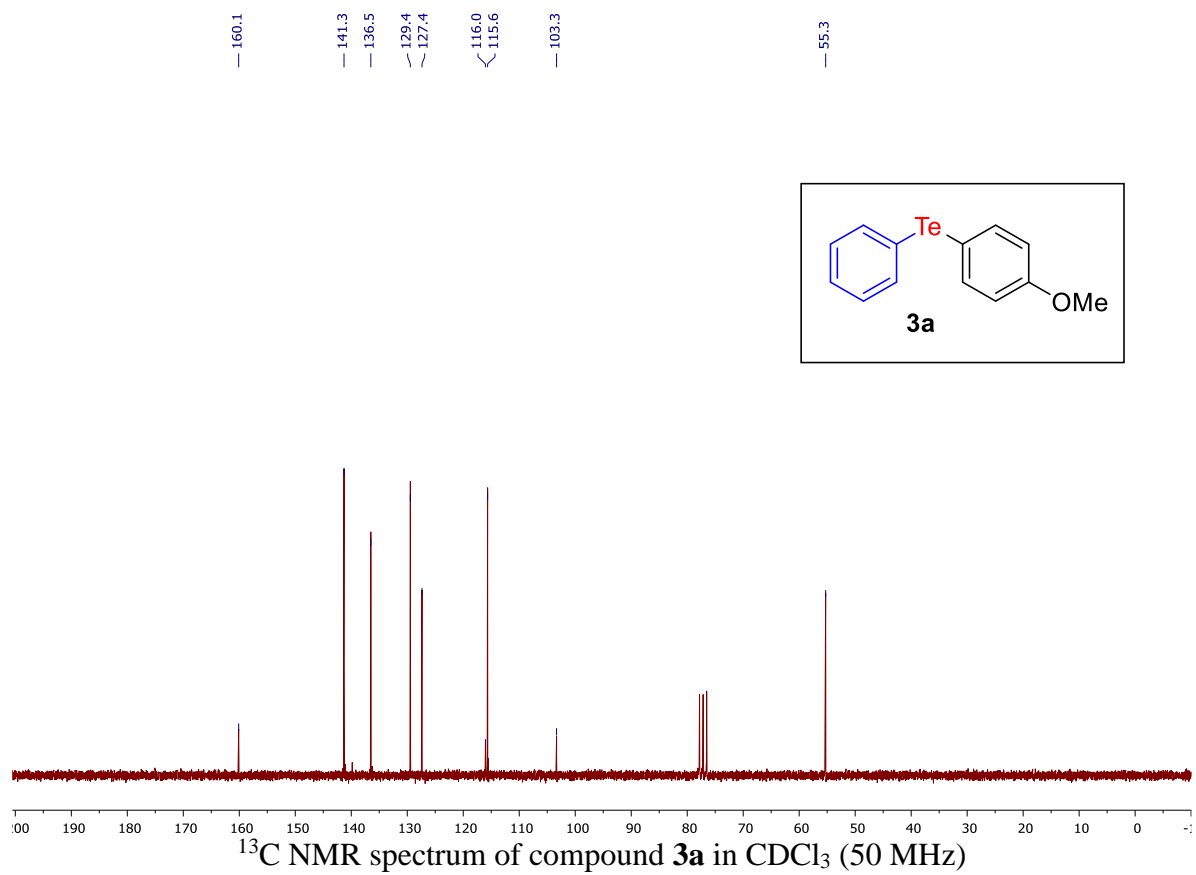

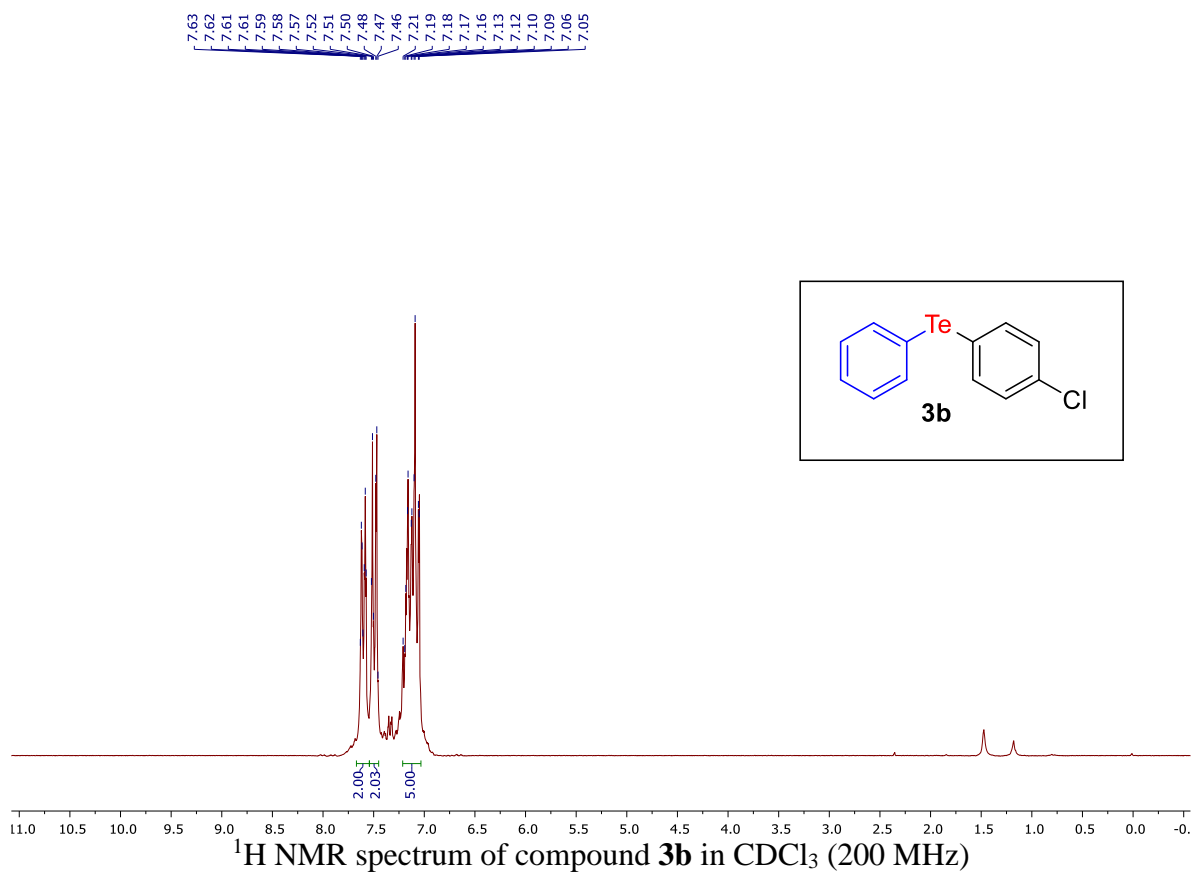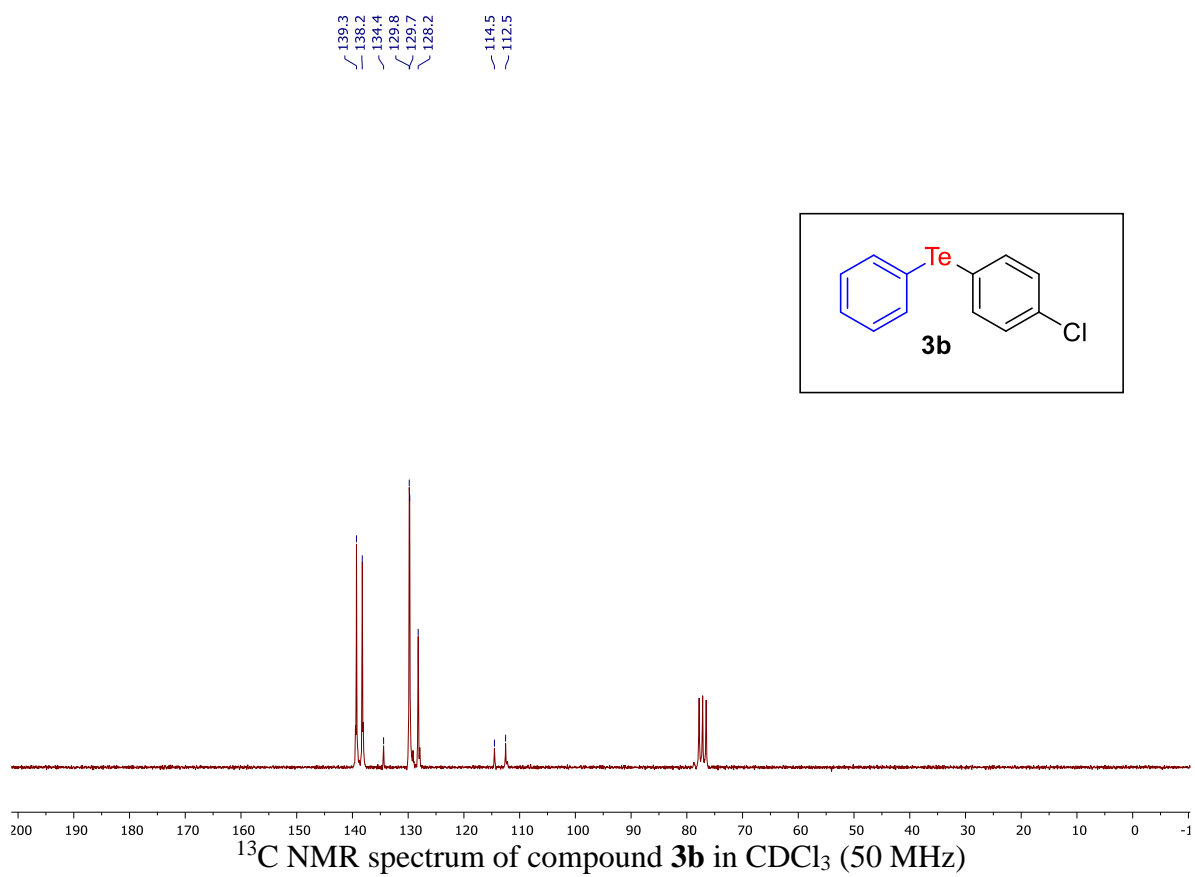

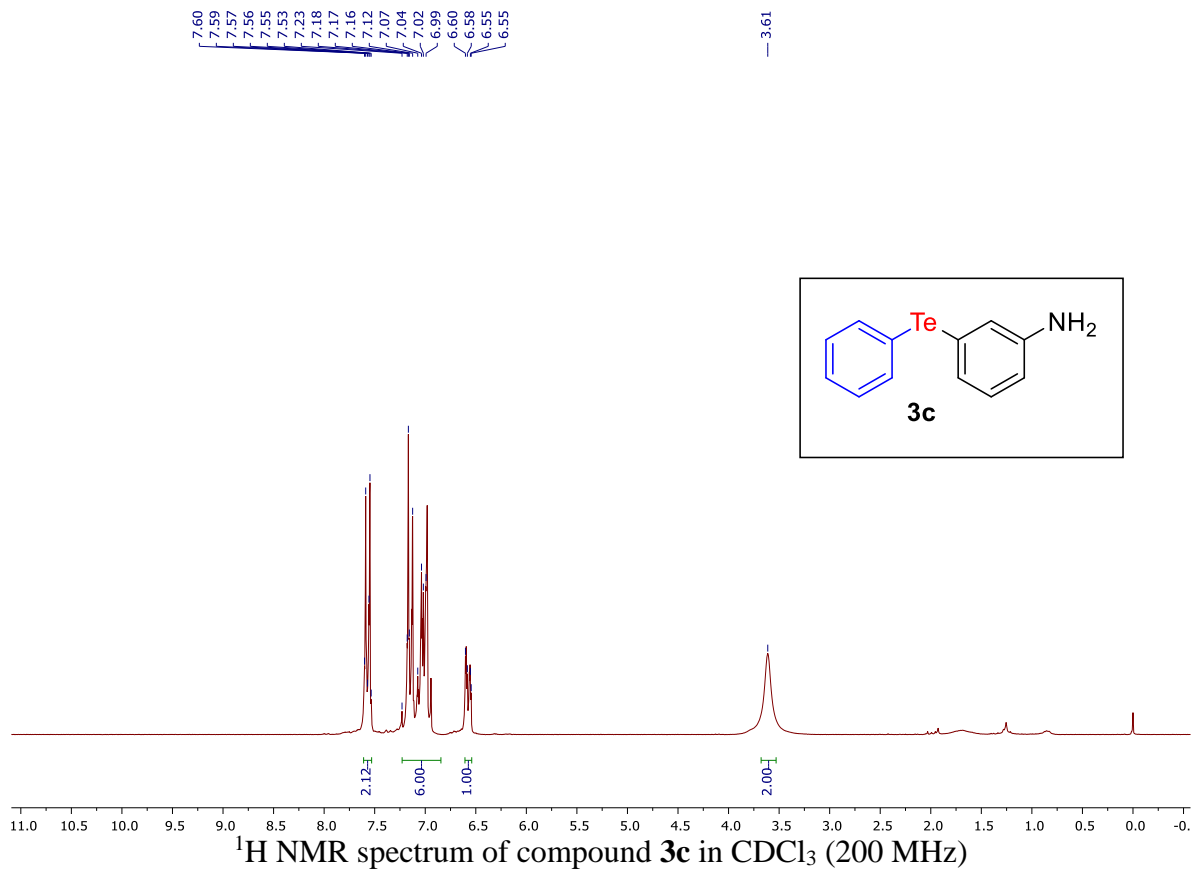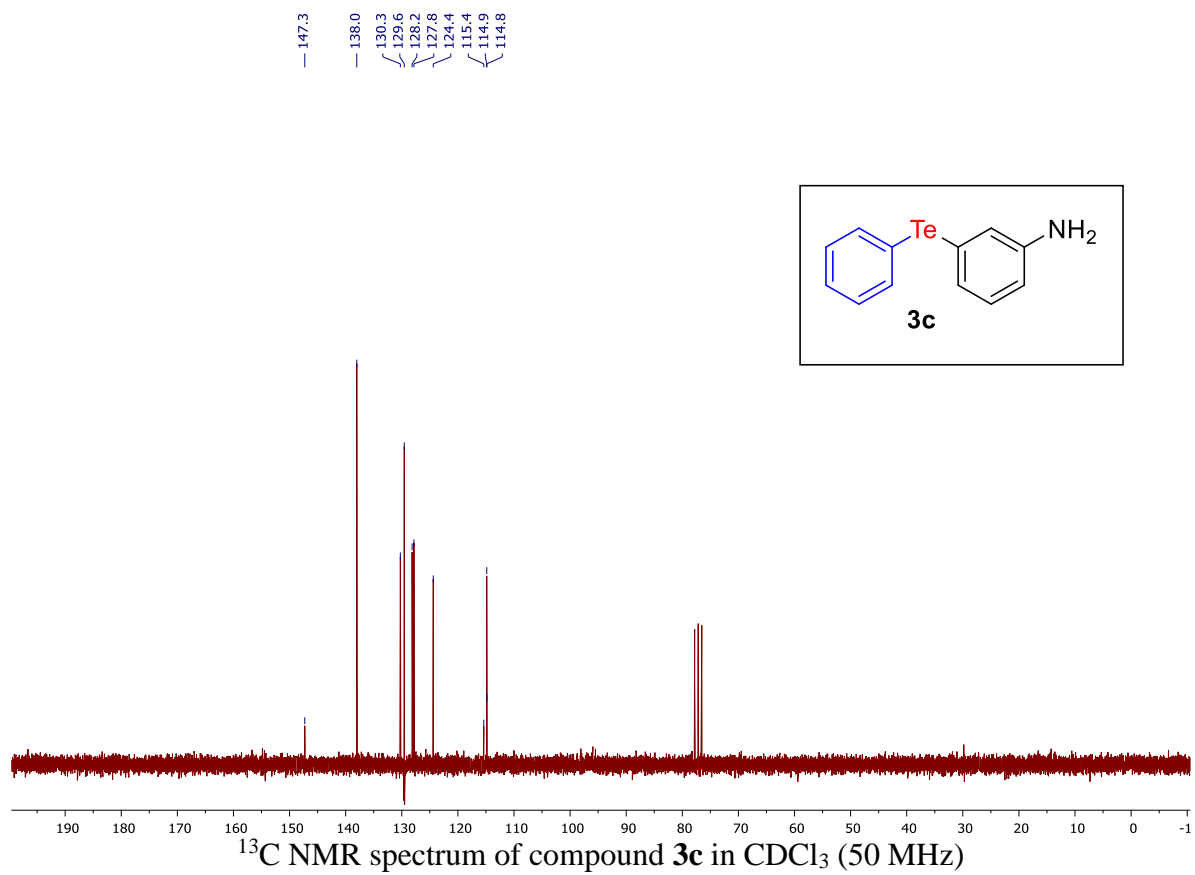

8.42  
8.07  
8.05  
7.86  
7.84  
7.82  
7.80  
7.41  
7.39  
7.37  
7.34  
7.32  
7.31  
7.30  
7.29  
7.28  
7.25

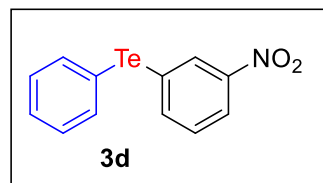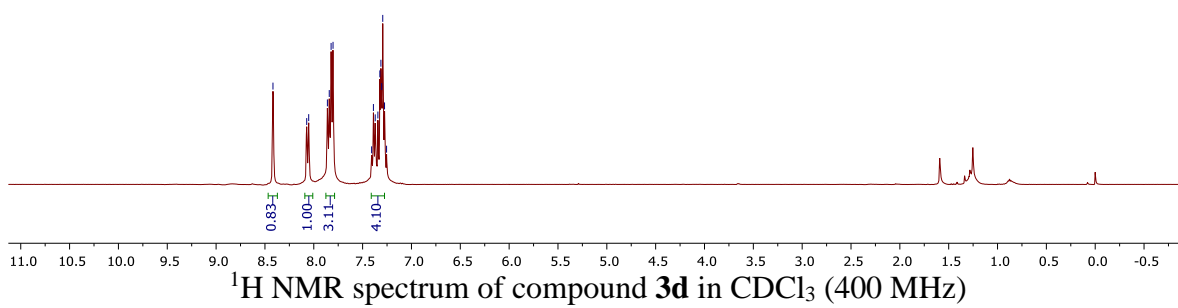

148.5  
142.4  
139.6  
131.1  
130.1  
130.0  
129.1  
122.5  
117.0  
113.2

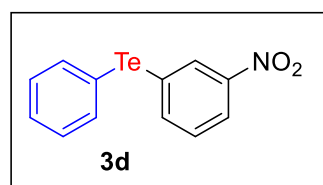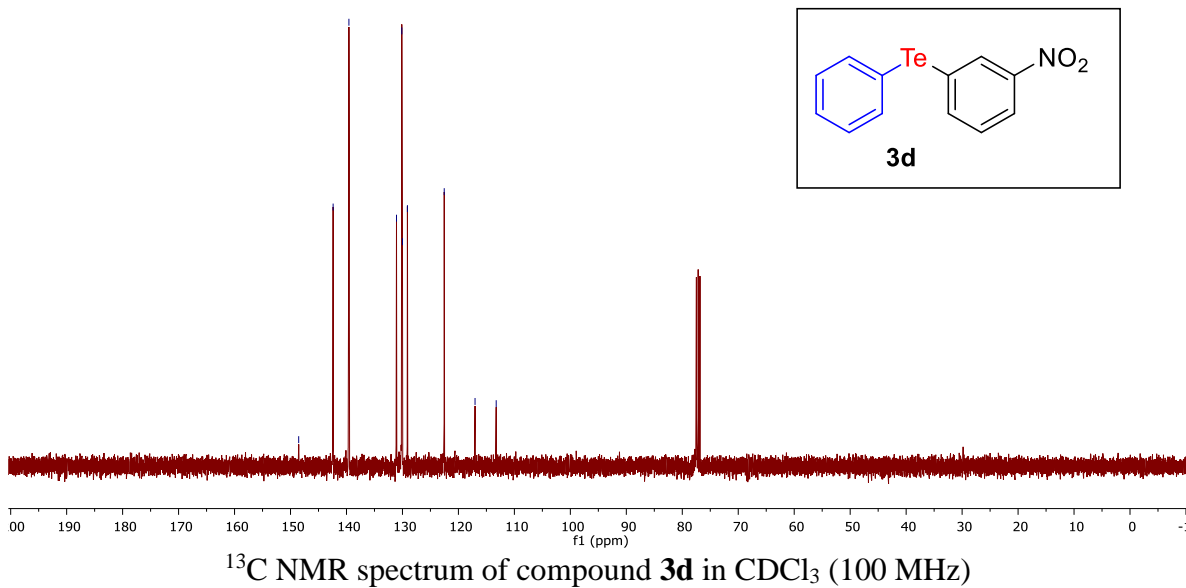

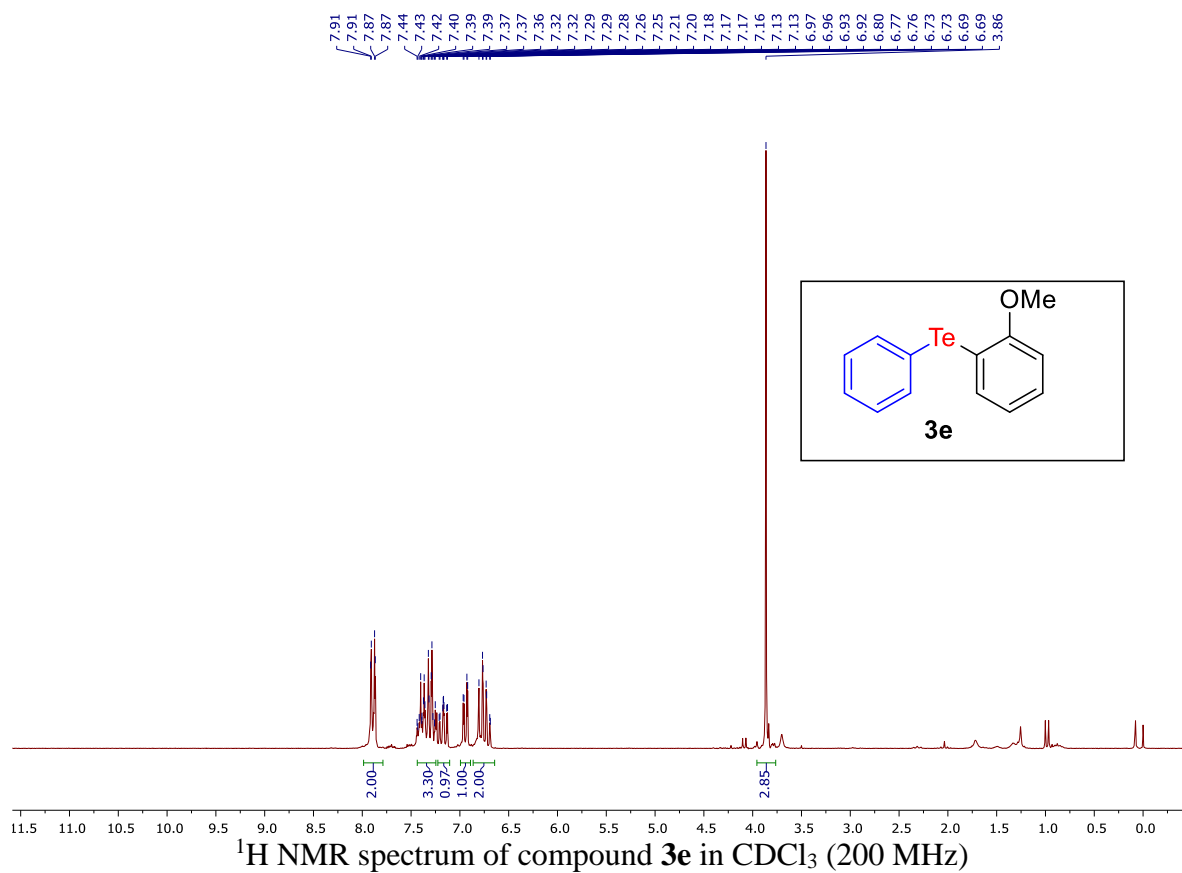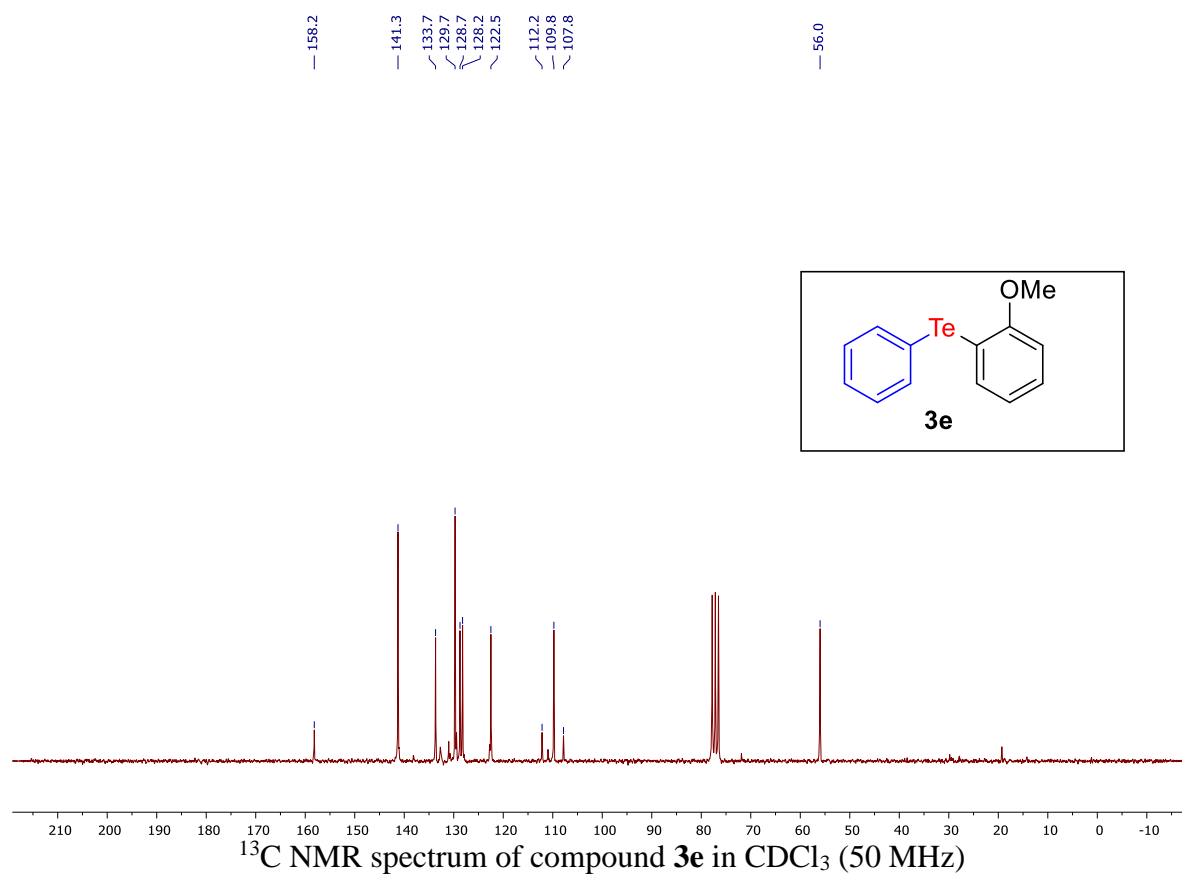

8.19  
8.18  
8.17  
8.15  
8.14  
7.99  
7.96  
7.85  
7.82  
7.79  
7.78  
7.77  
7.74  
7.62  
7.61  
7.59  
7.58  
7.57  
7.51  
7.49  
7.48  
7.47  
7.46  
7.45  
7.44  
7.28  
7.25  
7.24  
7.21  
7.20  
7.18  
7.18  
7.17  
7.16  
7.13  
7.12  
7.09  
7.08

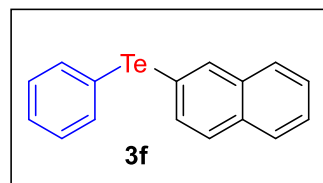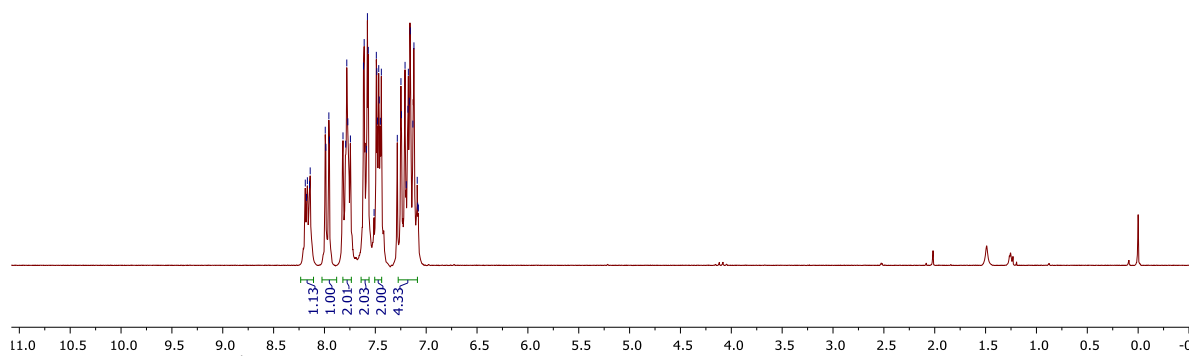

$^1\text{H}$  NMR spectrum of compound **3f** in  $\text{CDCl}_3$  (200 MHz)

138.9  
137.5  
135.9  
133.8  
131.8  
129.6  
128.9  
127.8  
127.1  
126.6  
126.4  
117.9  
114.9

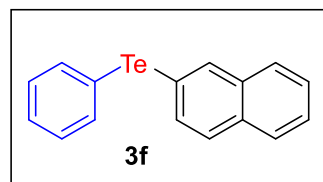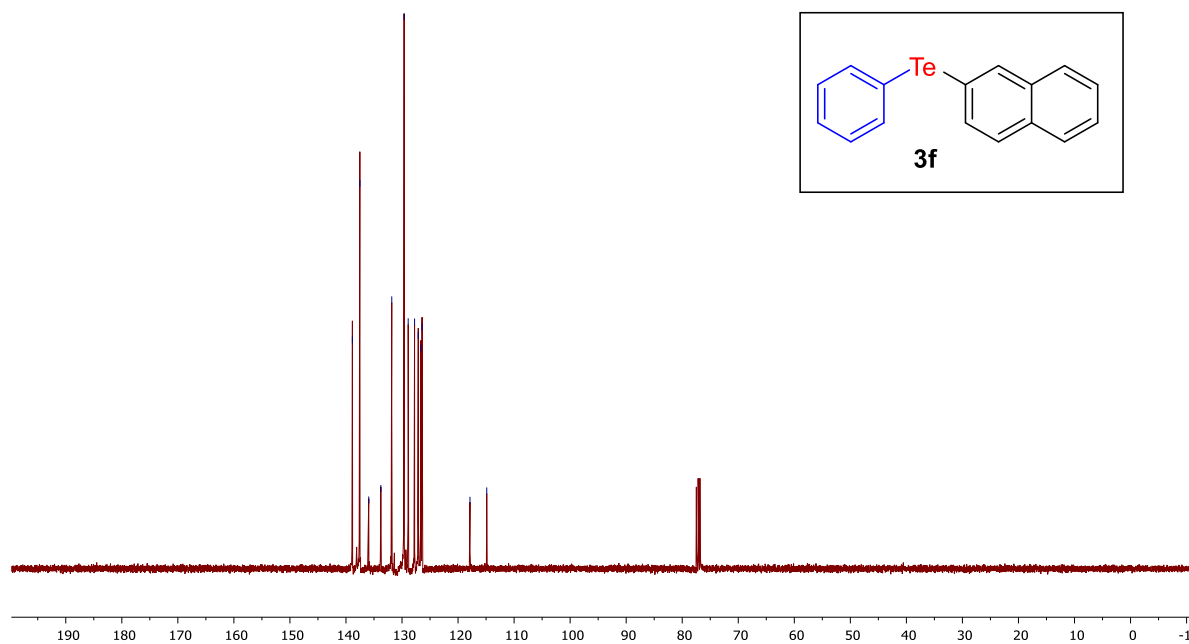

$^{13}\text{C}$  NMR spectrum of compound **3f** in  $\text{CDCl}_3$  (100 MHz)

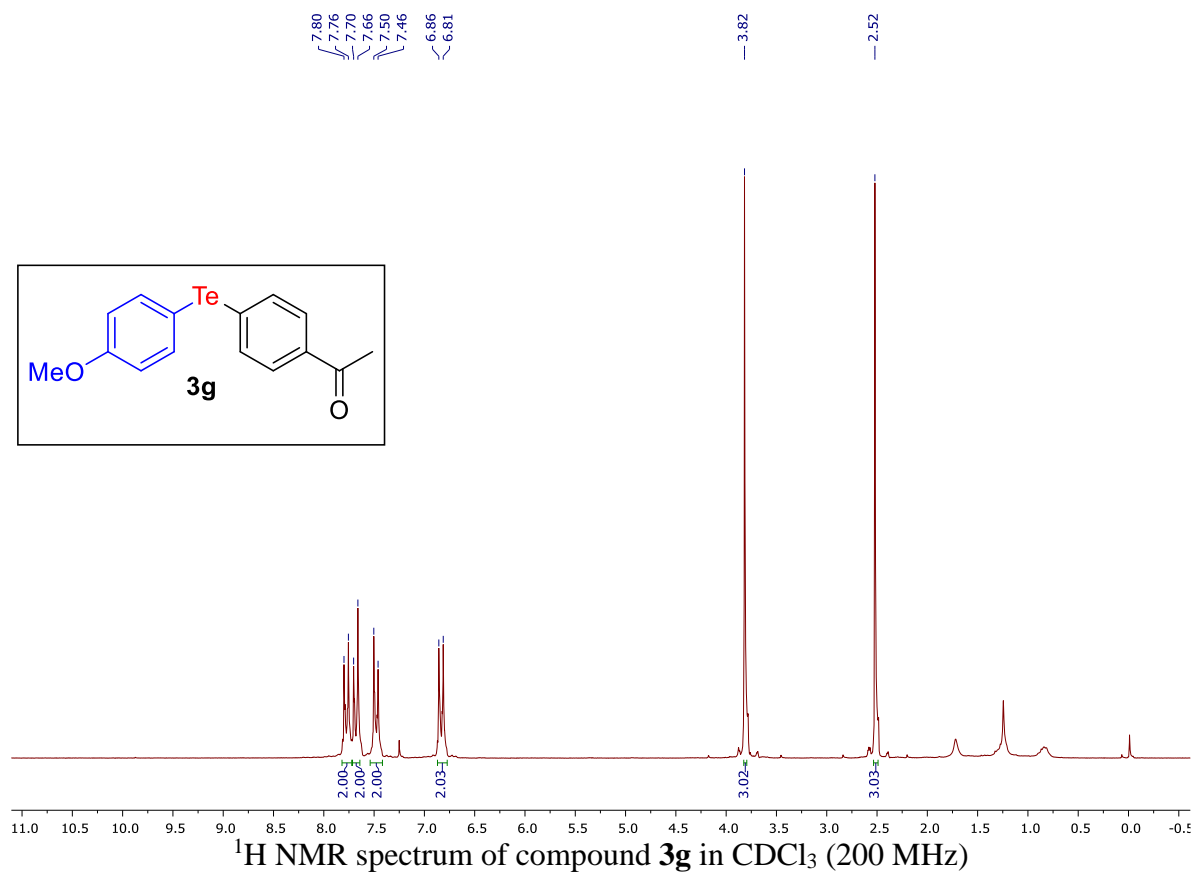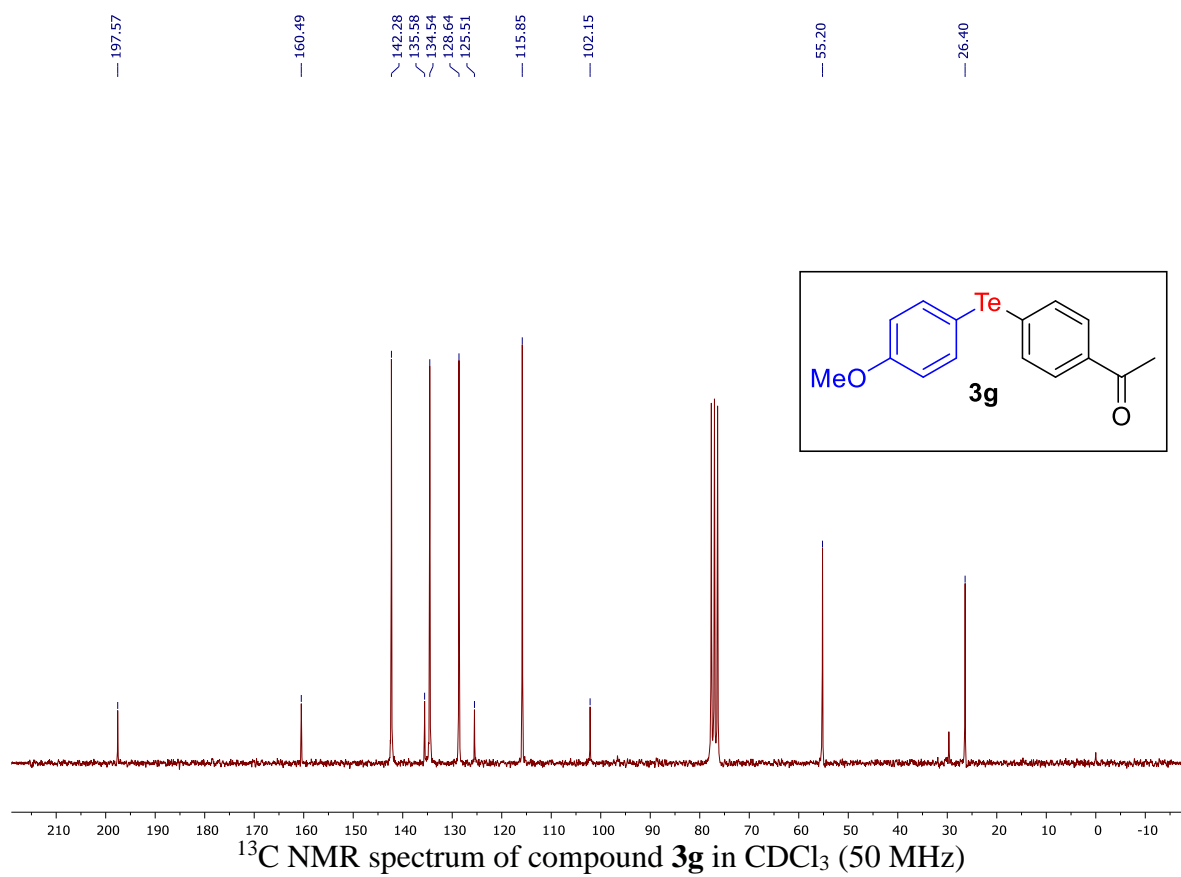



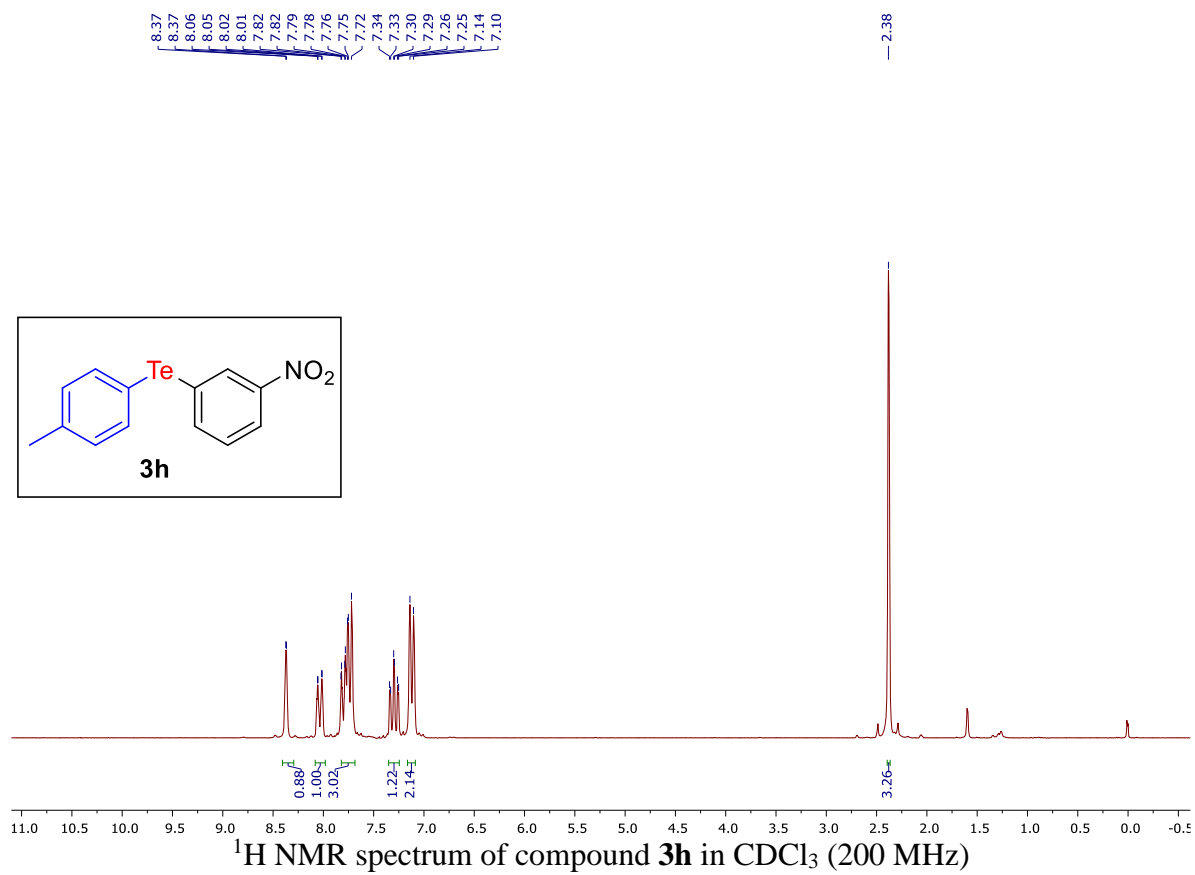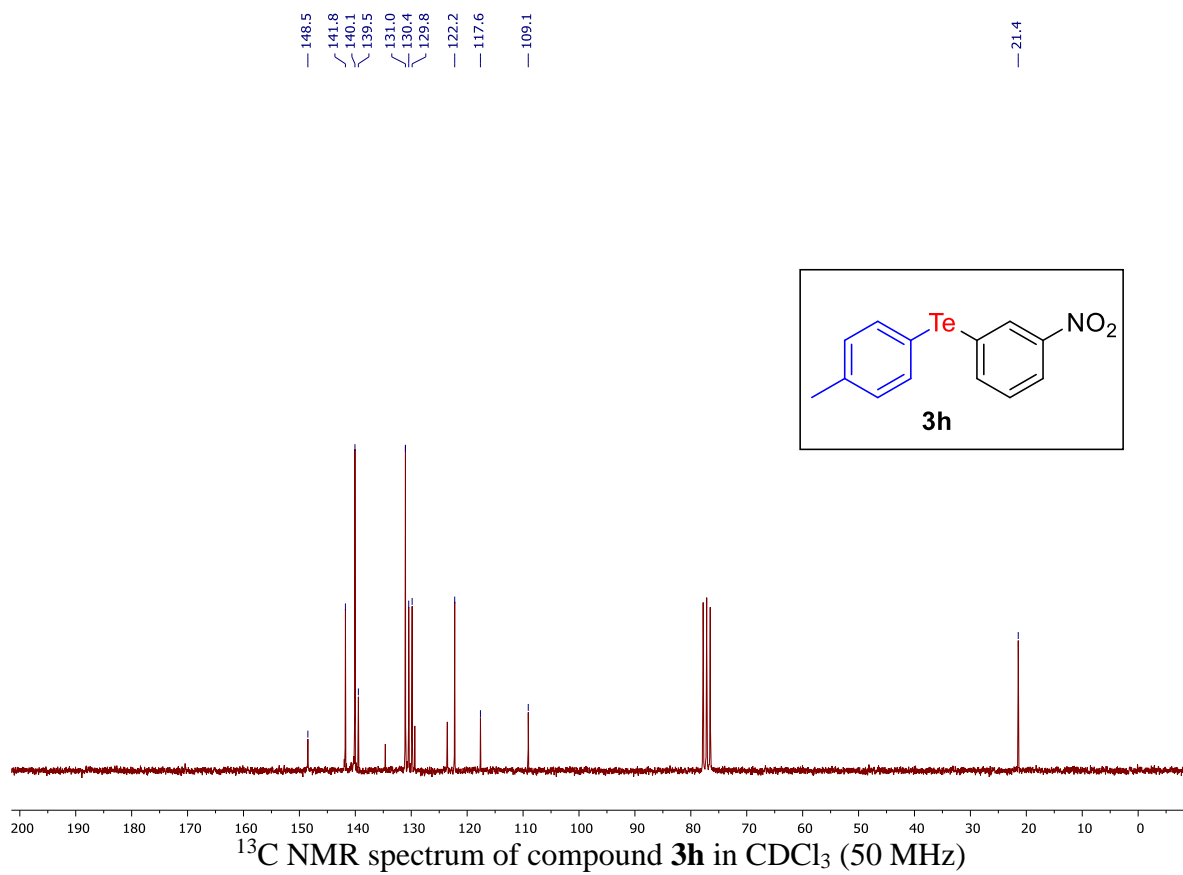

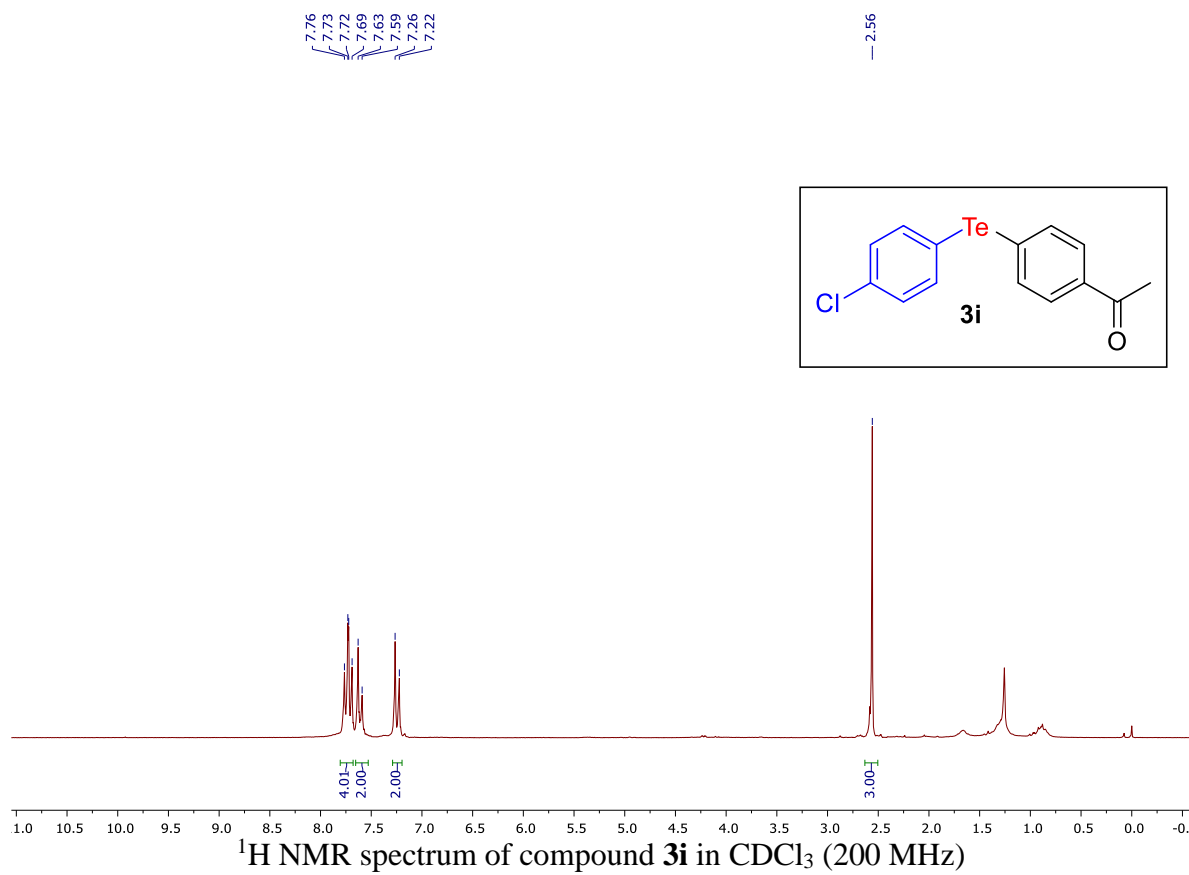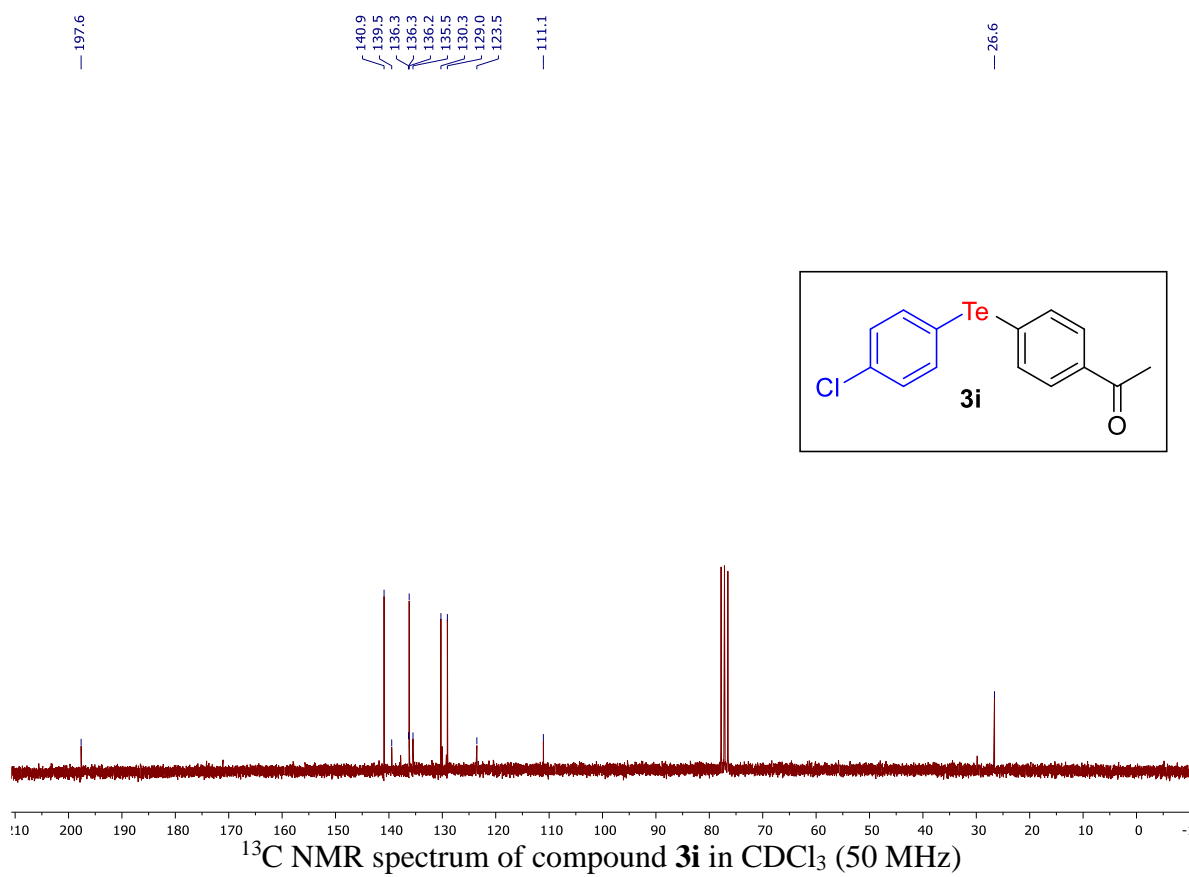

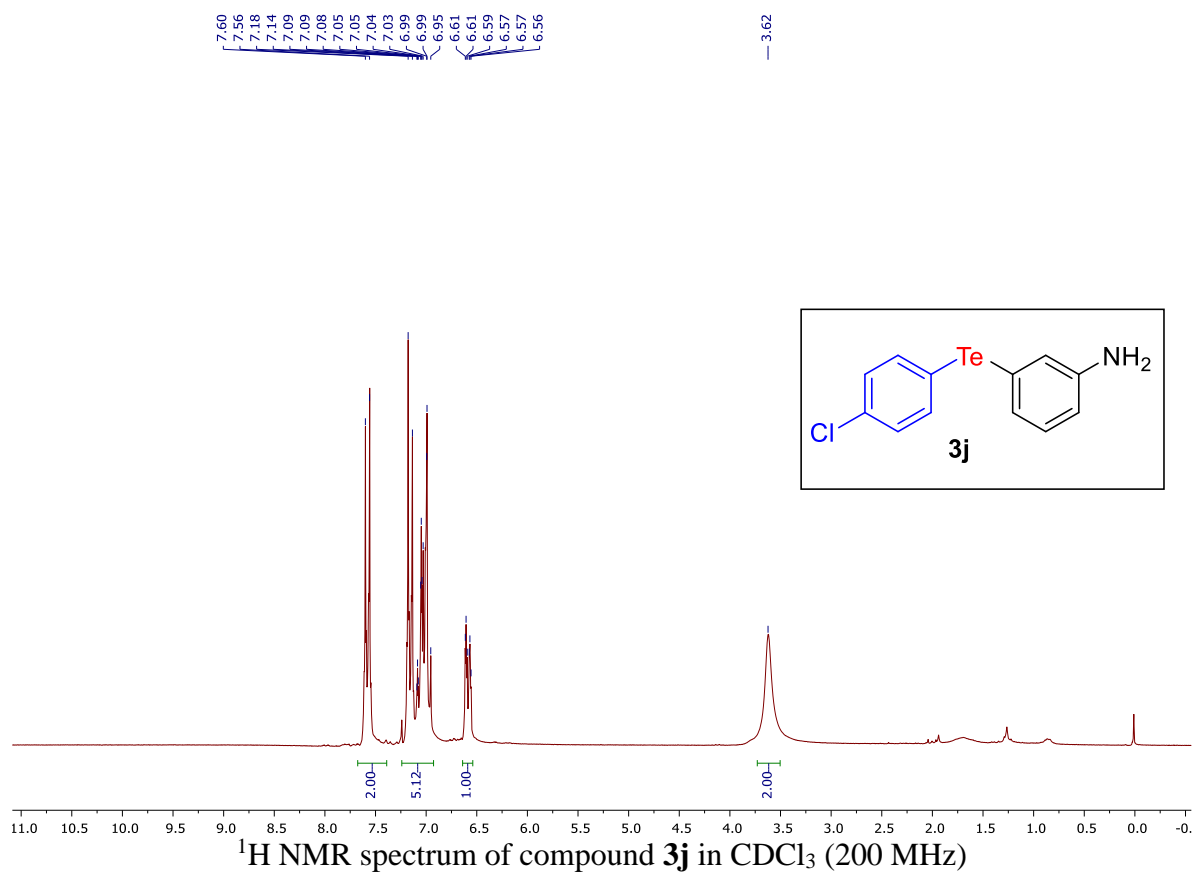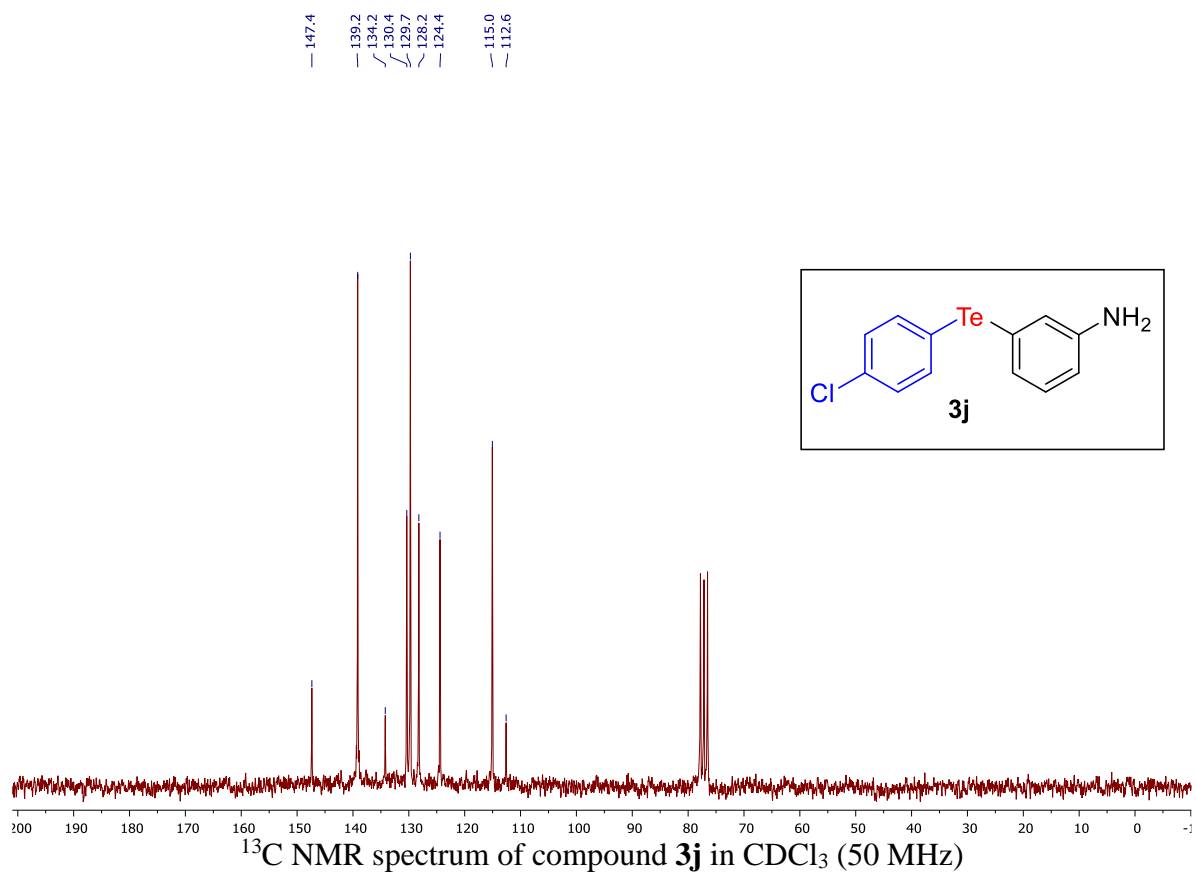

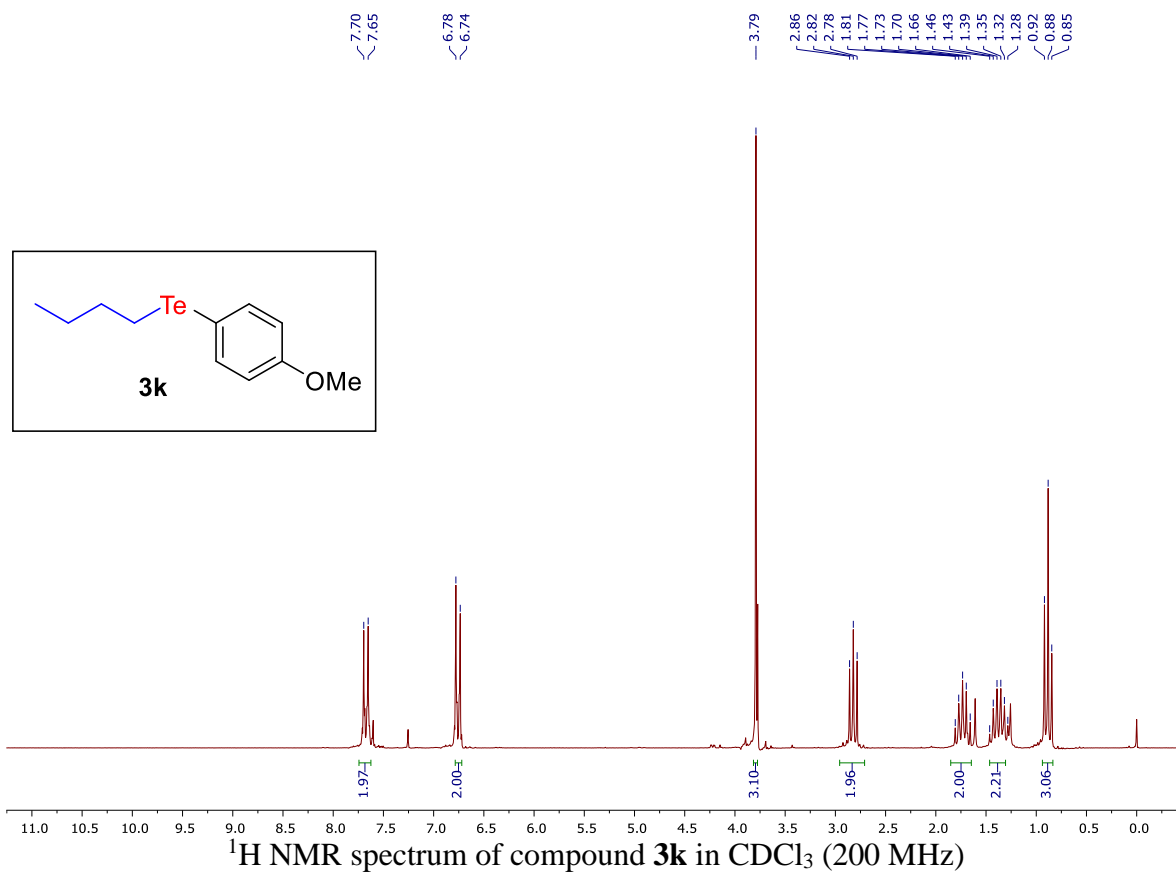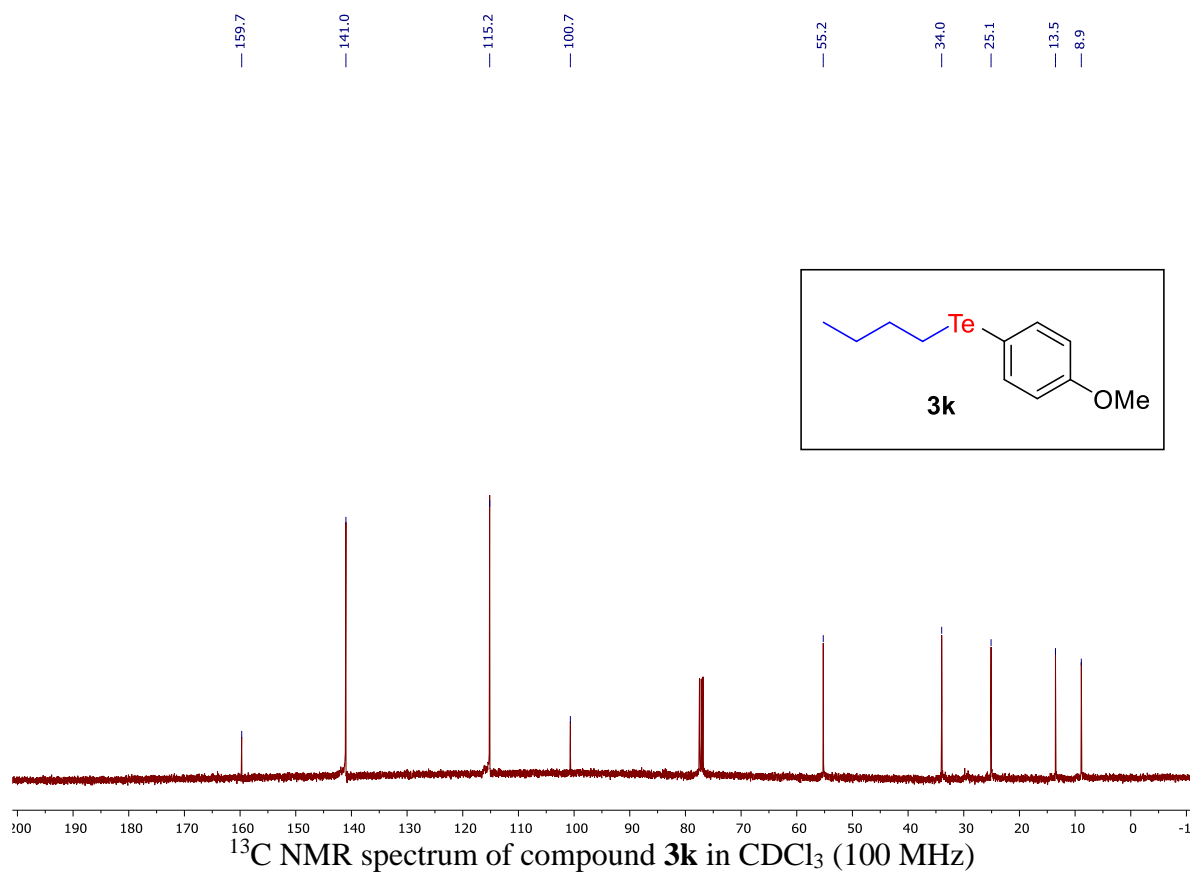

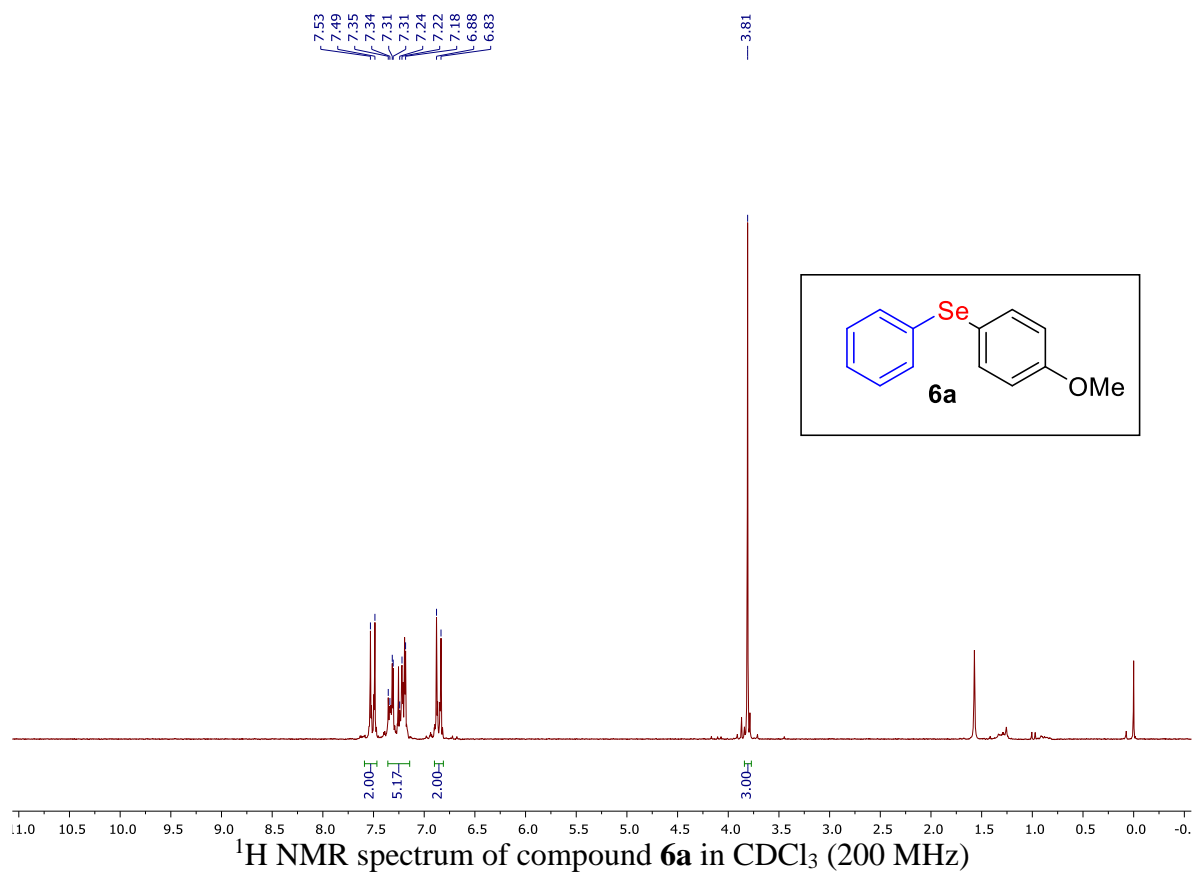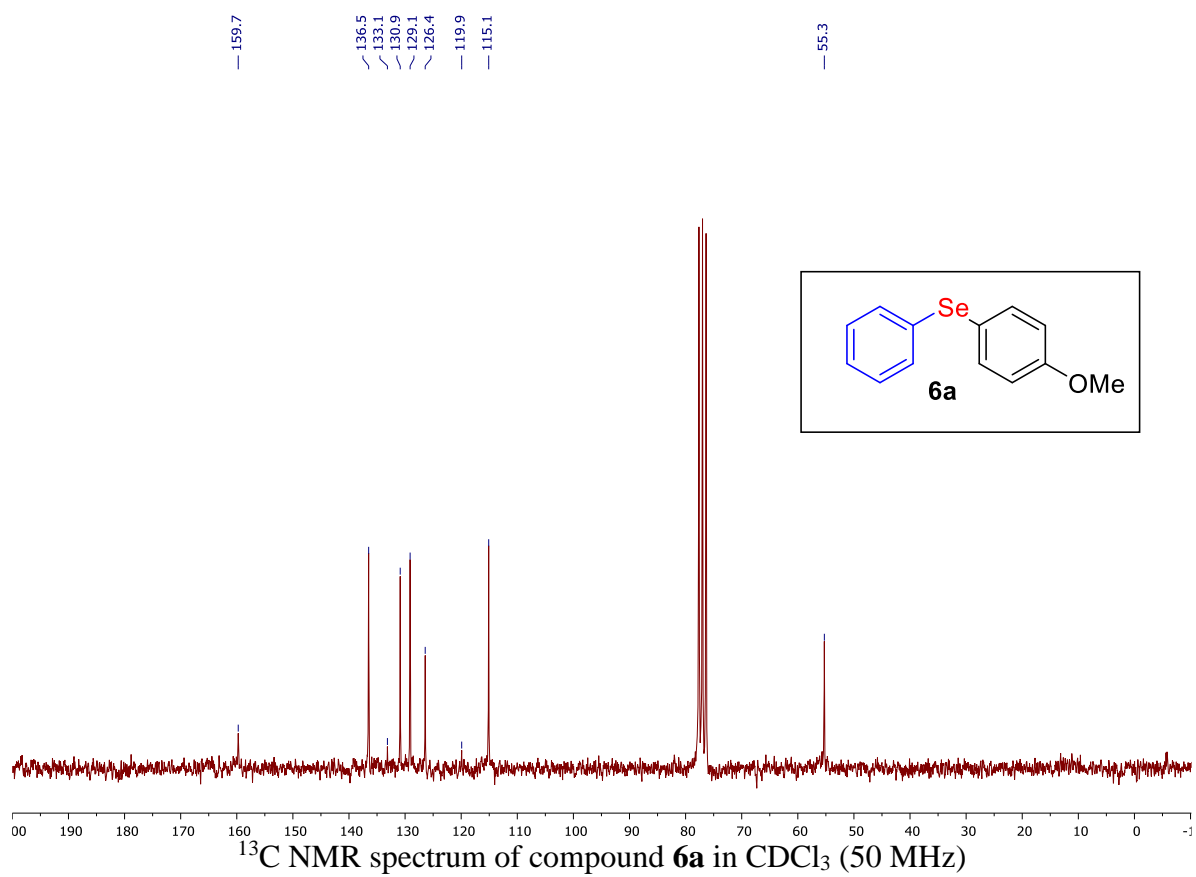

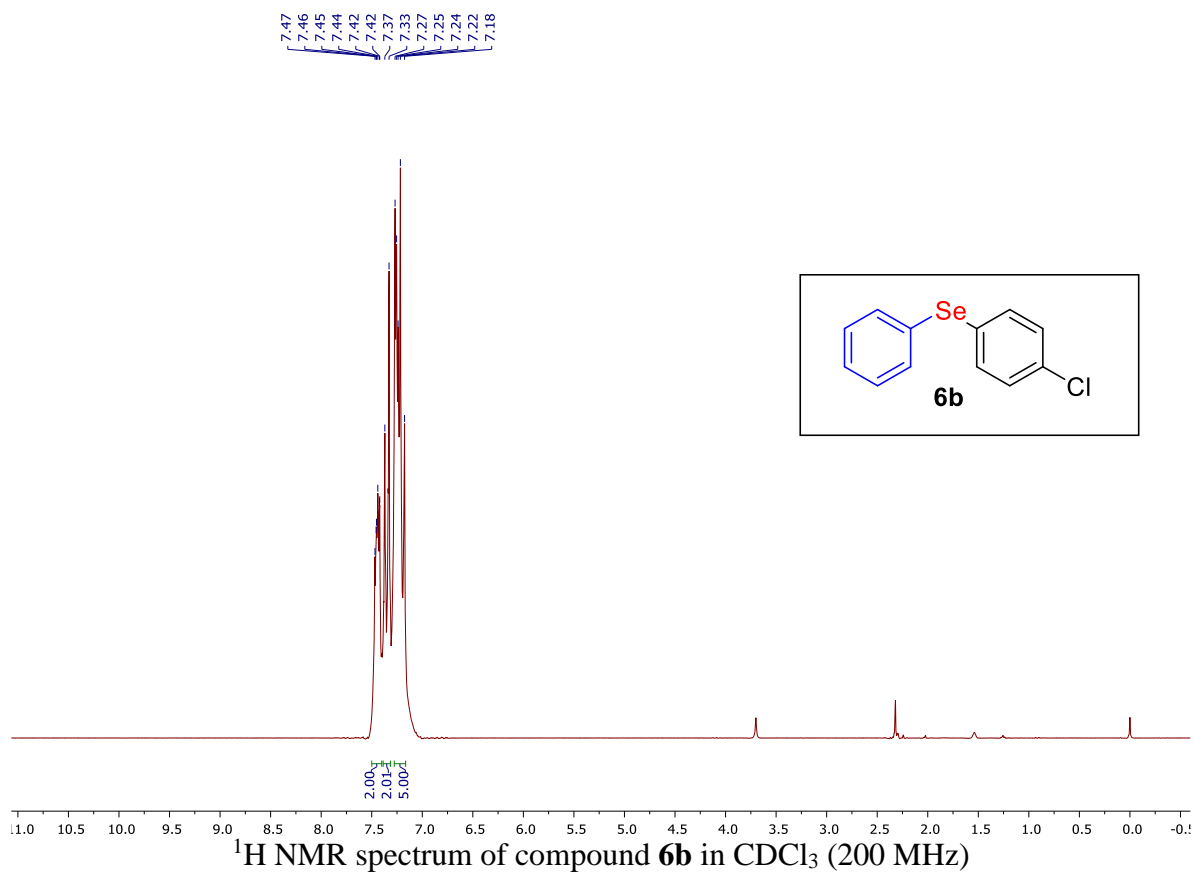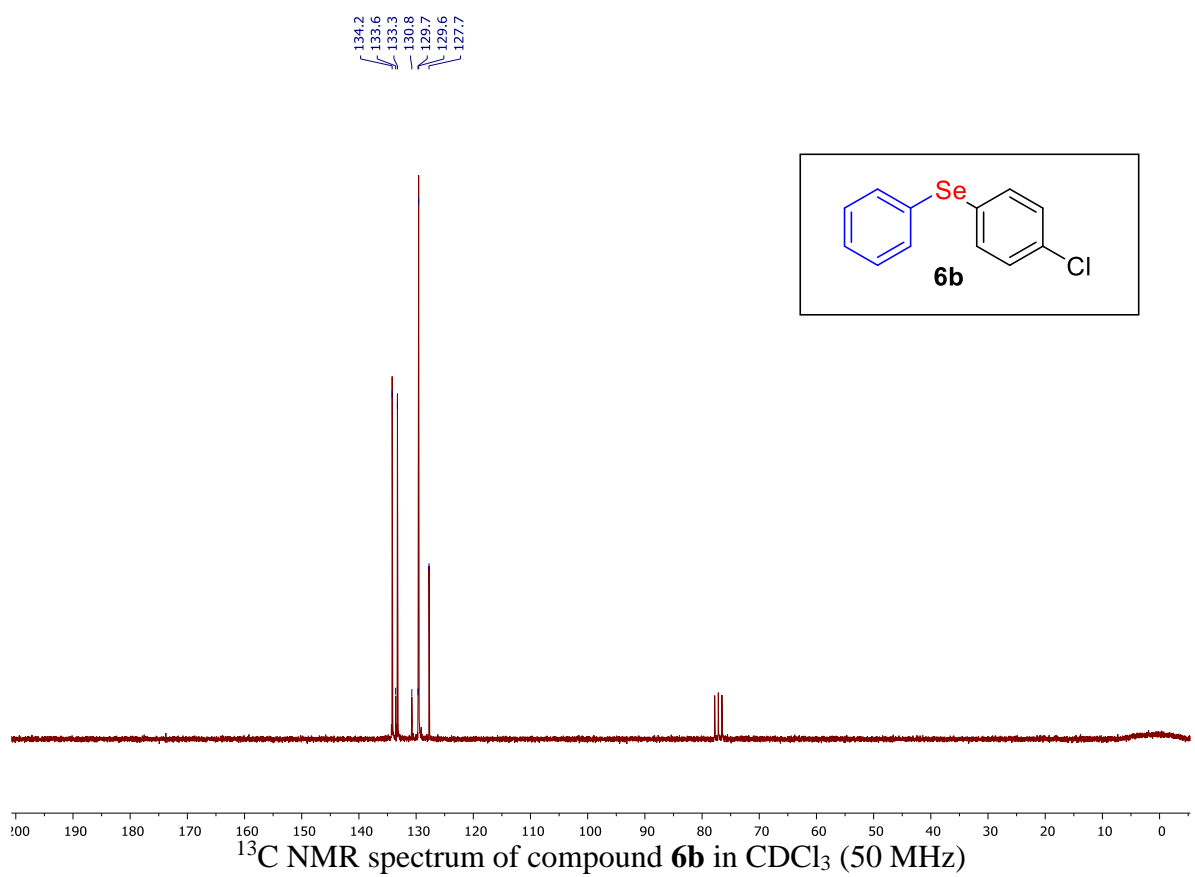

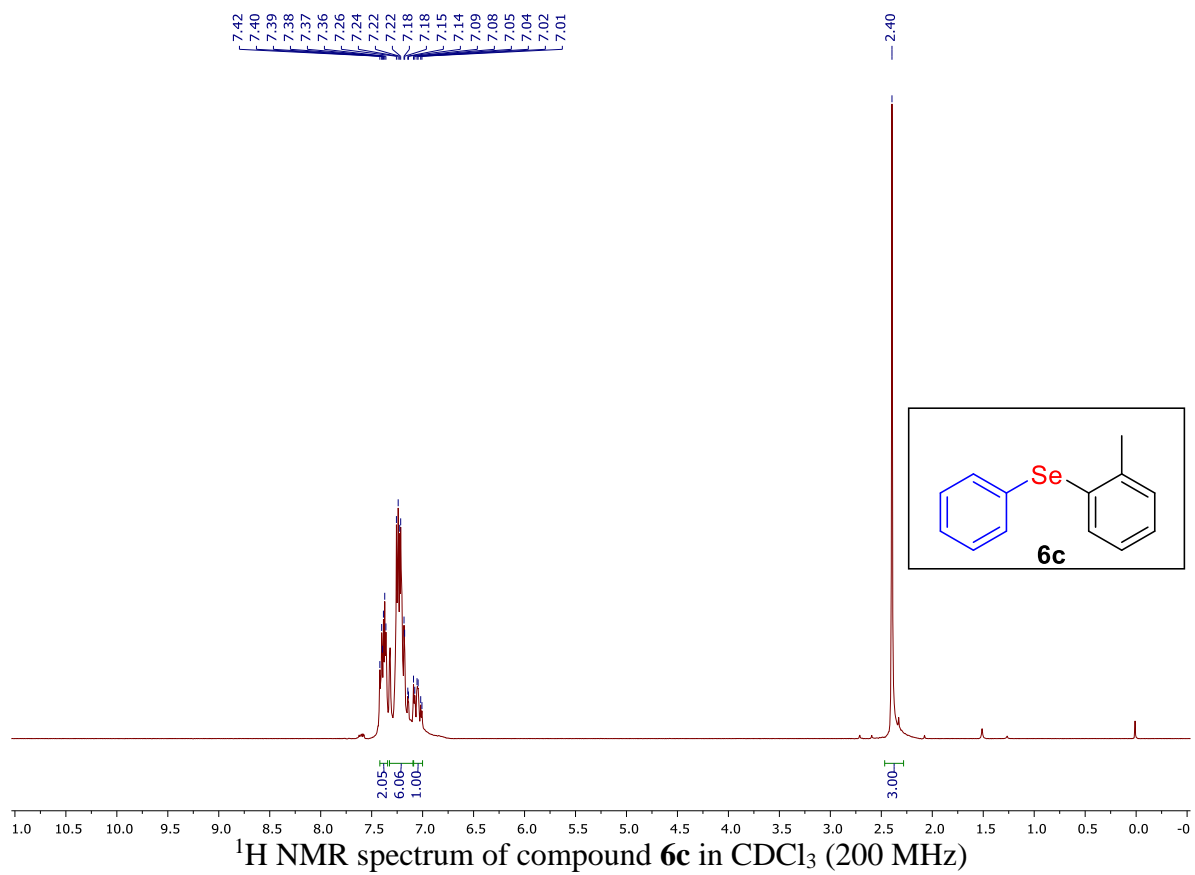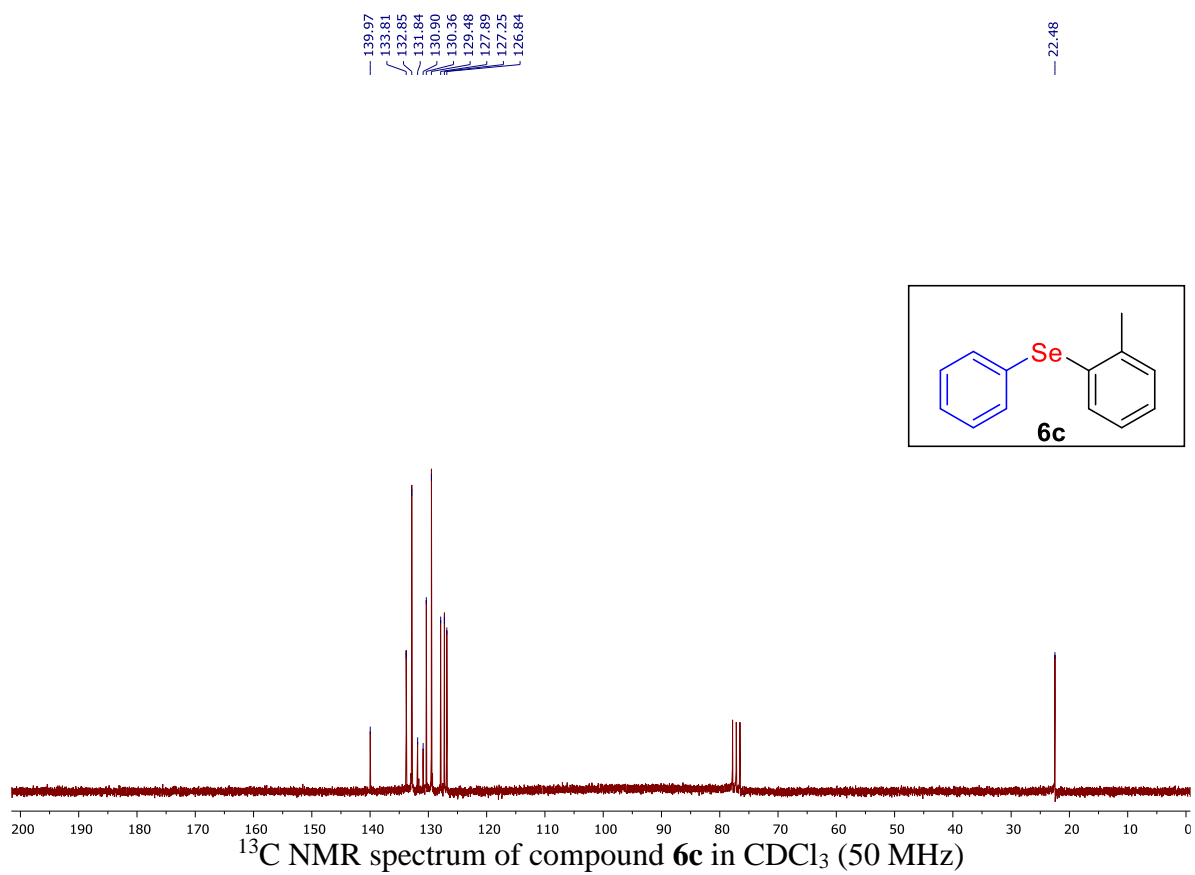

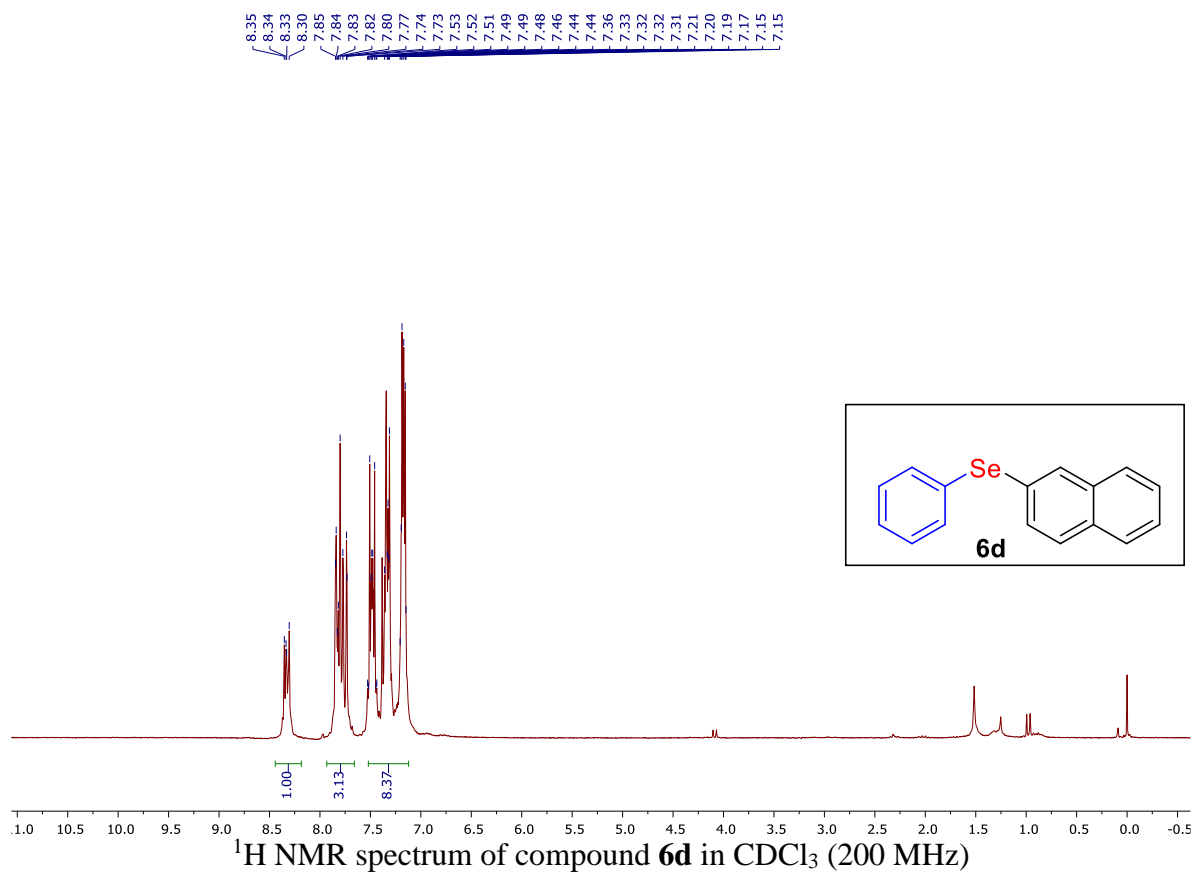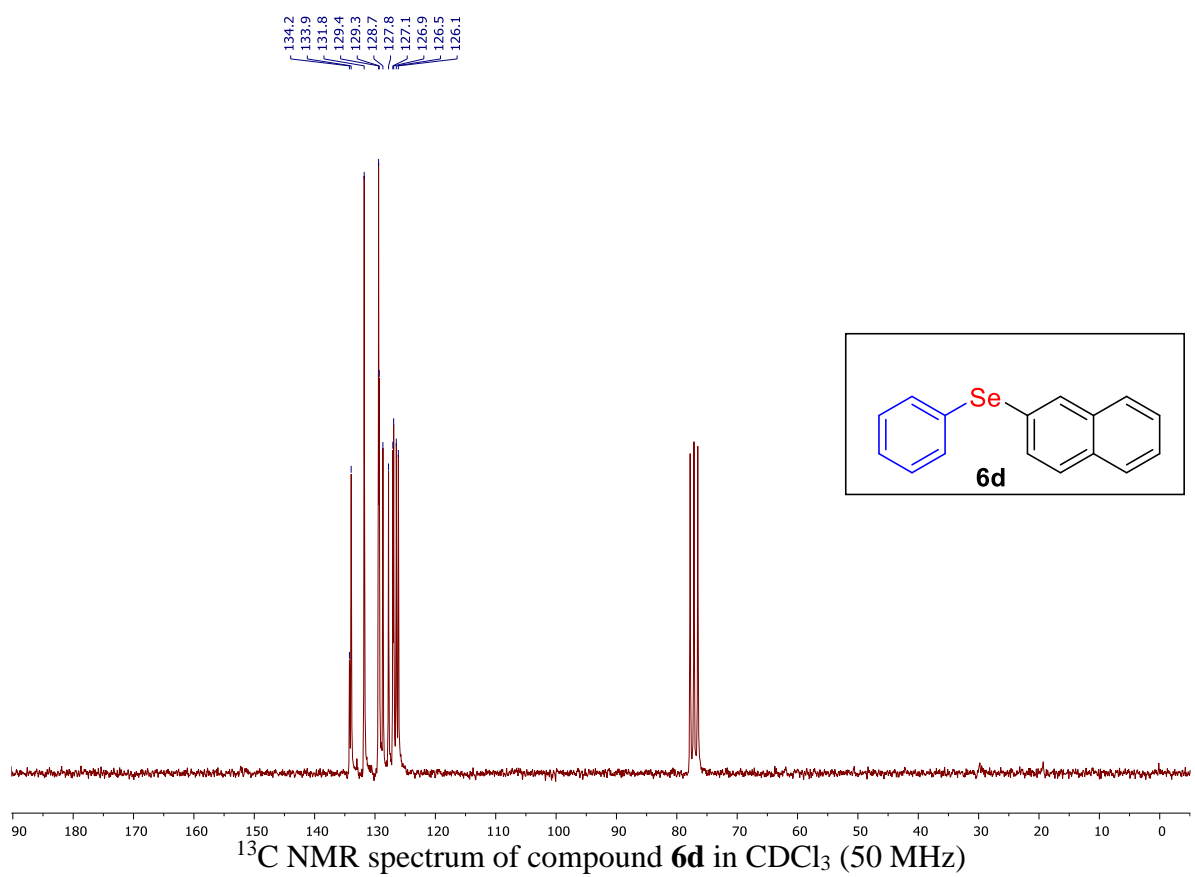



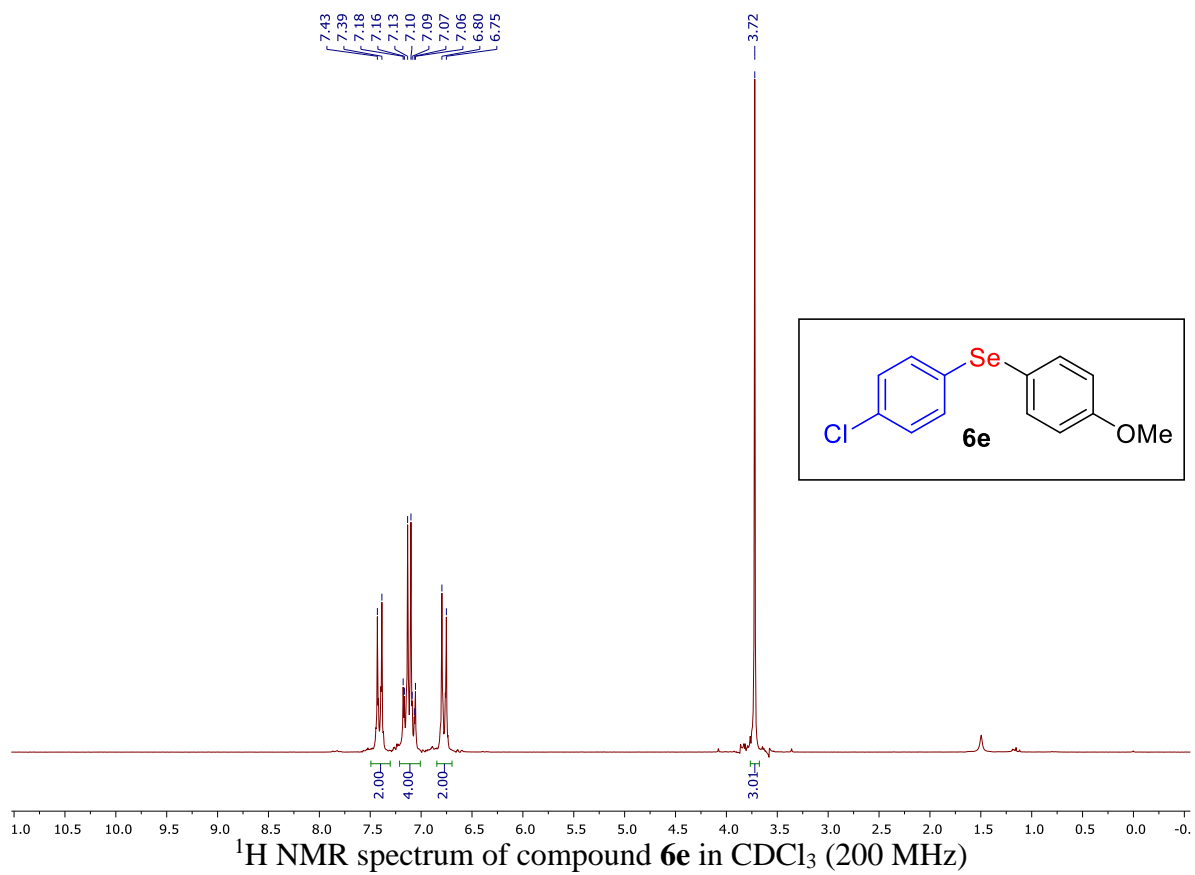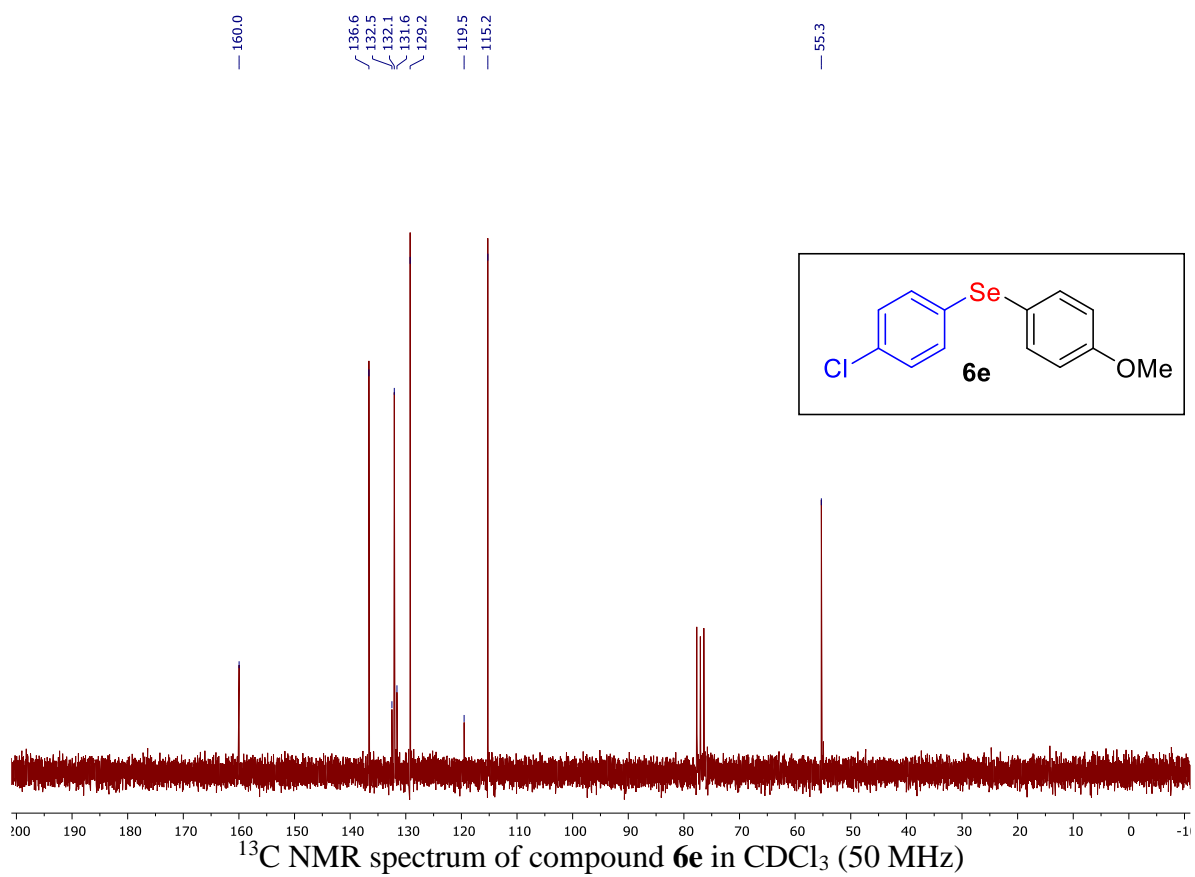

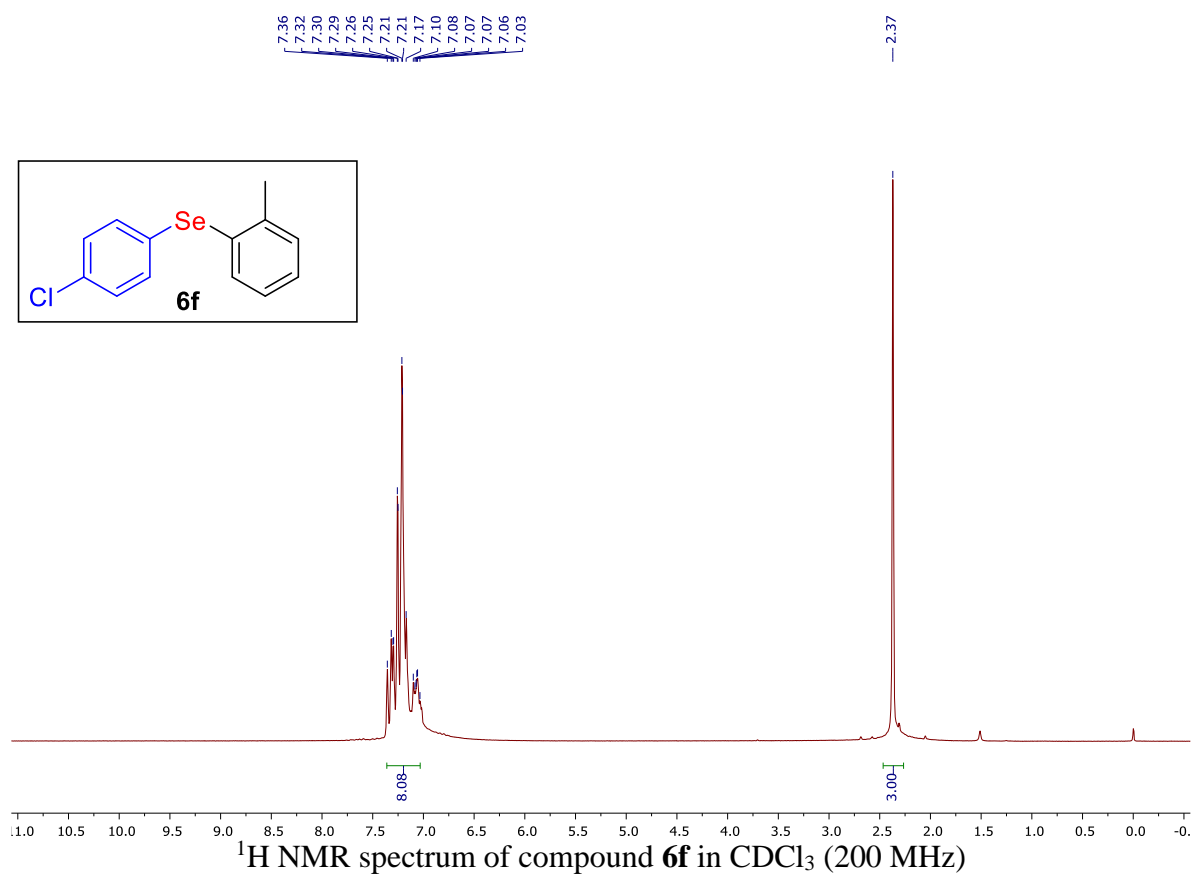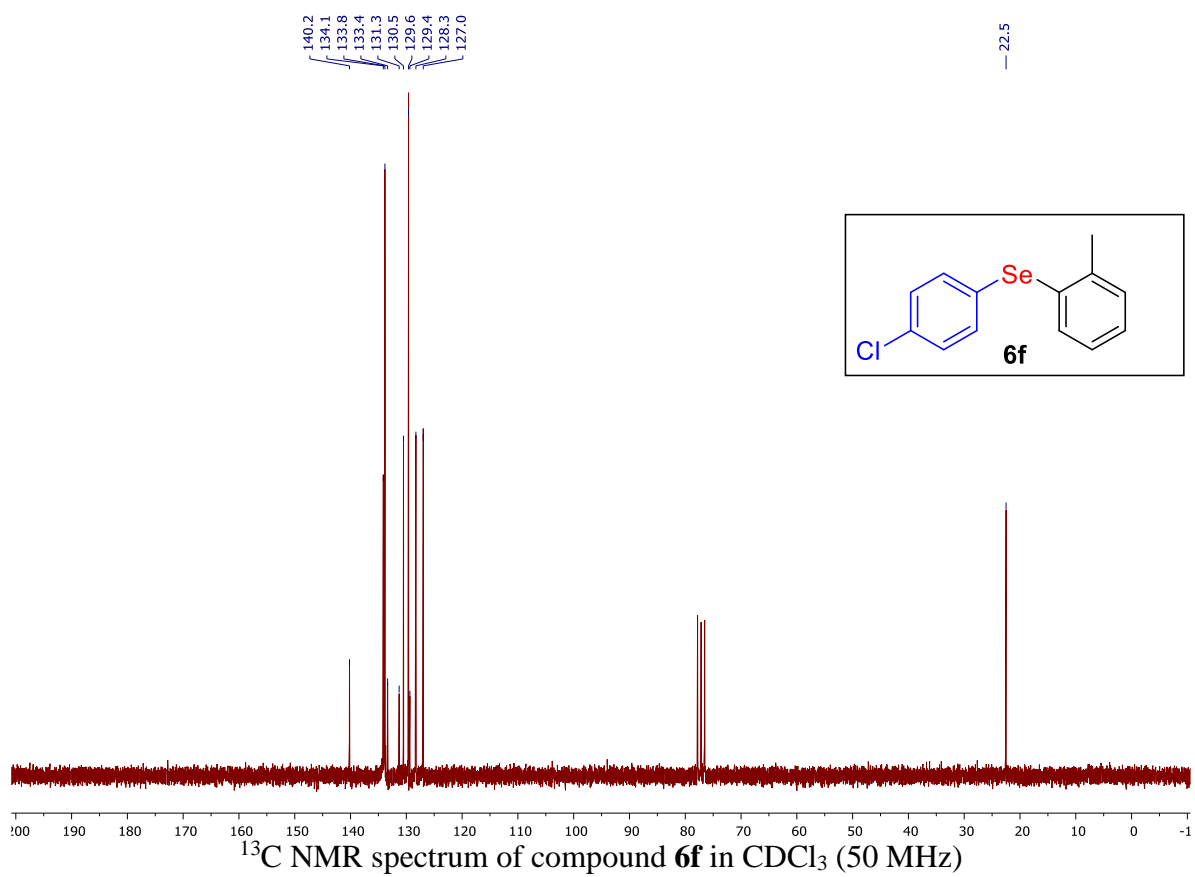

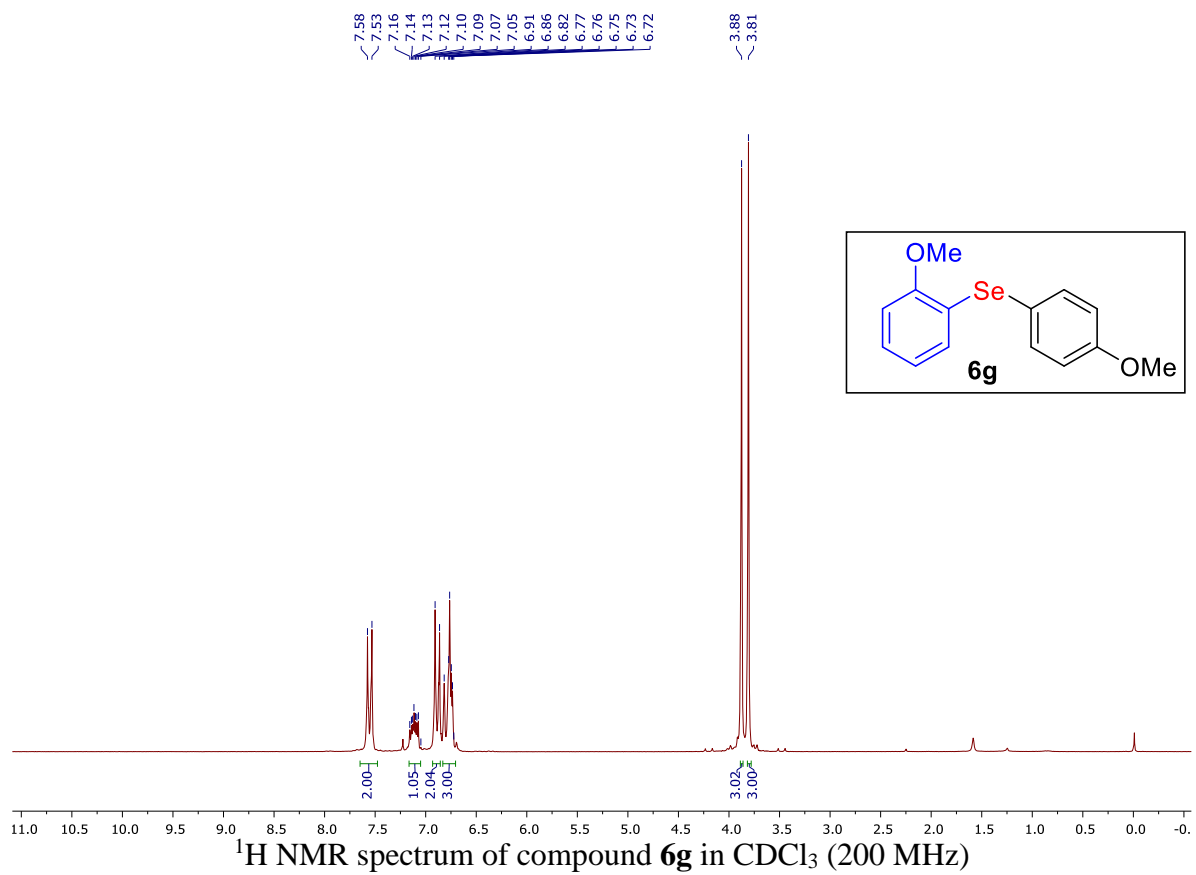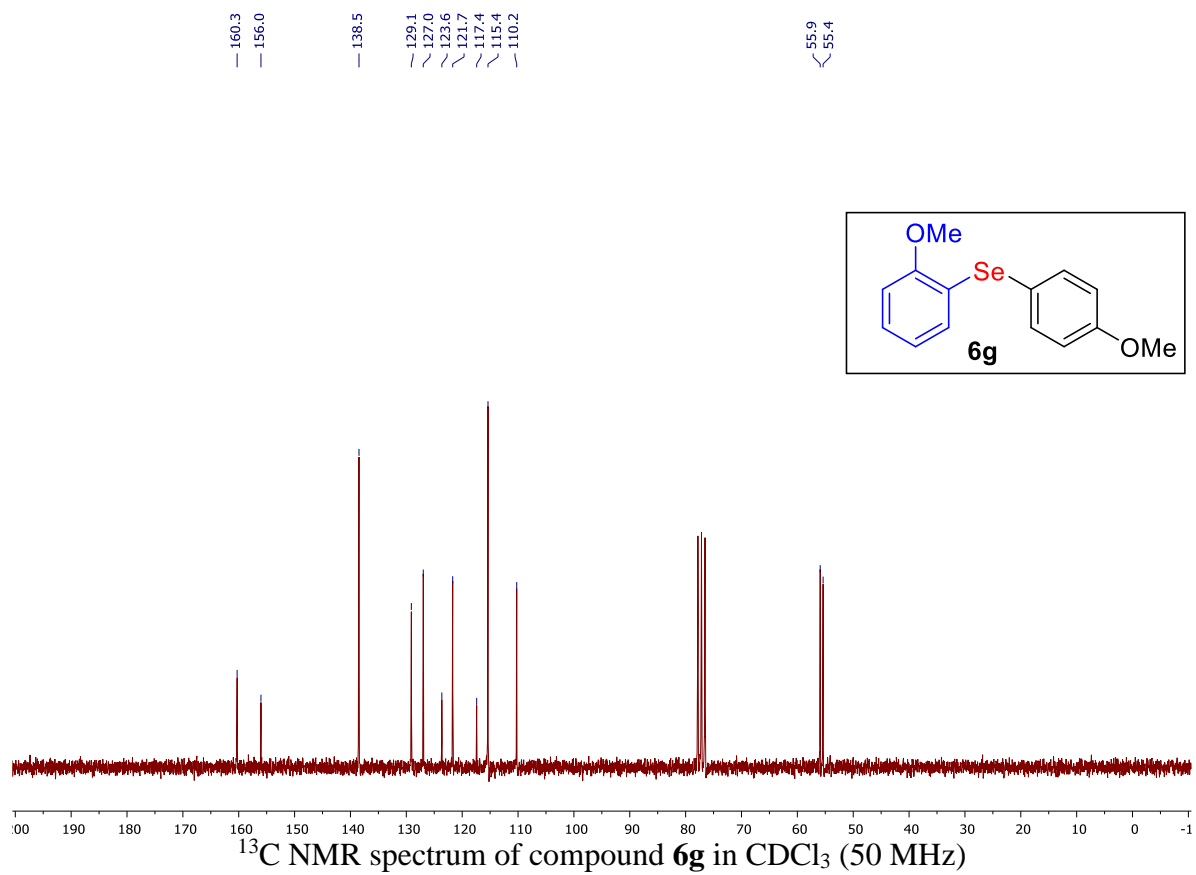

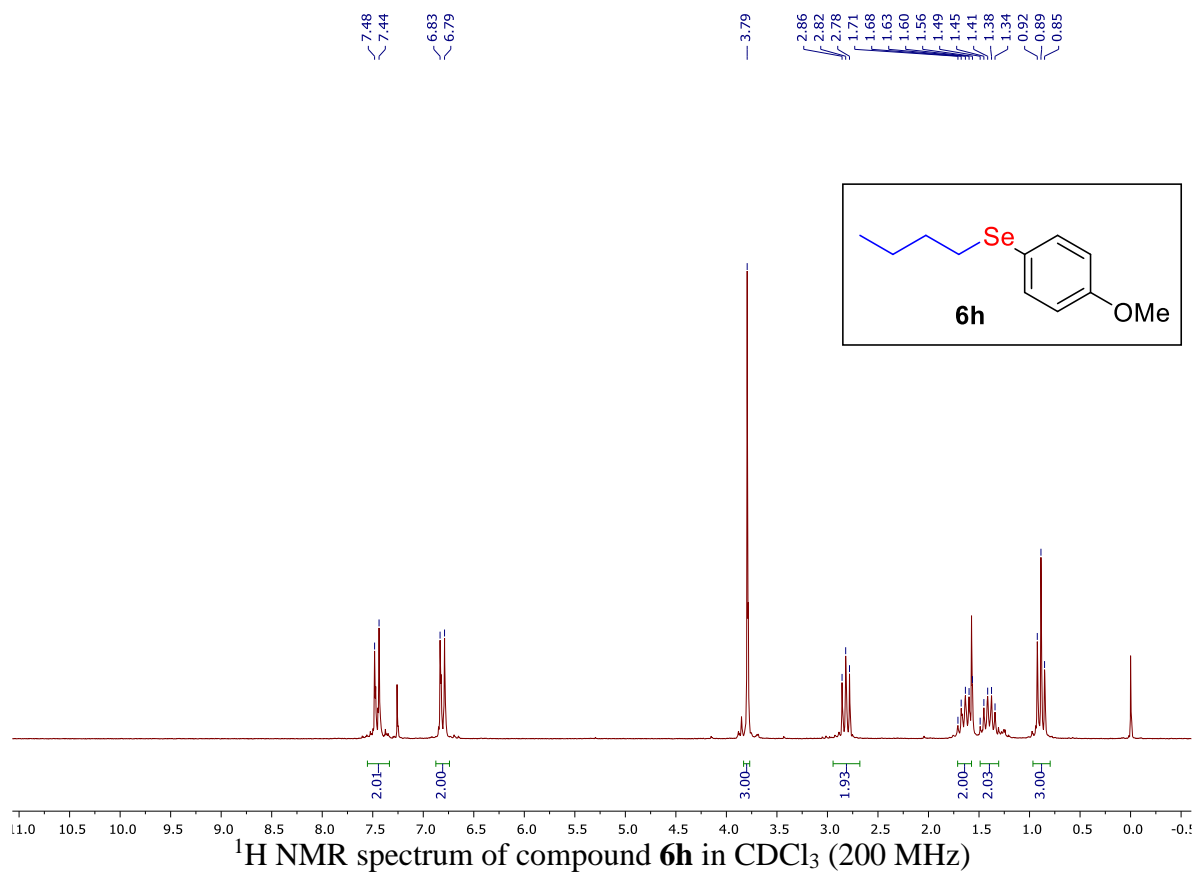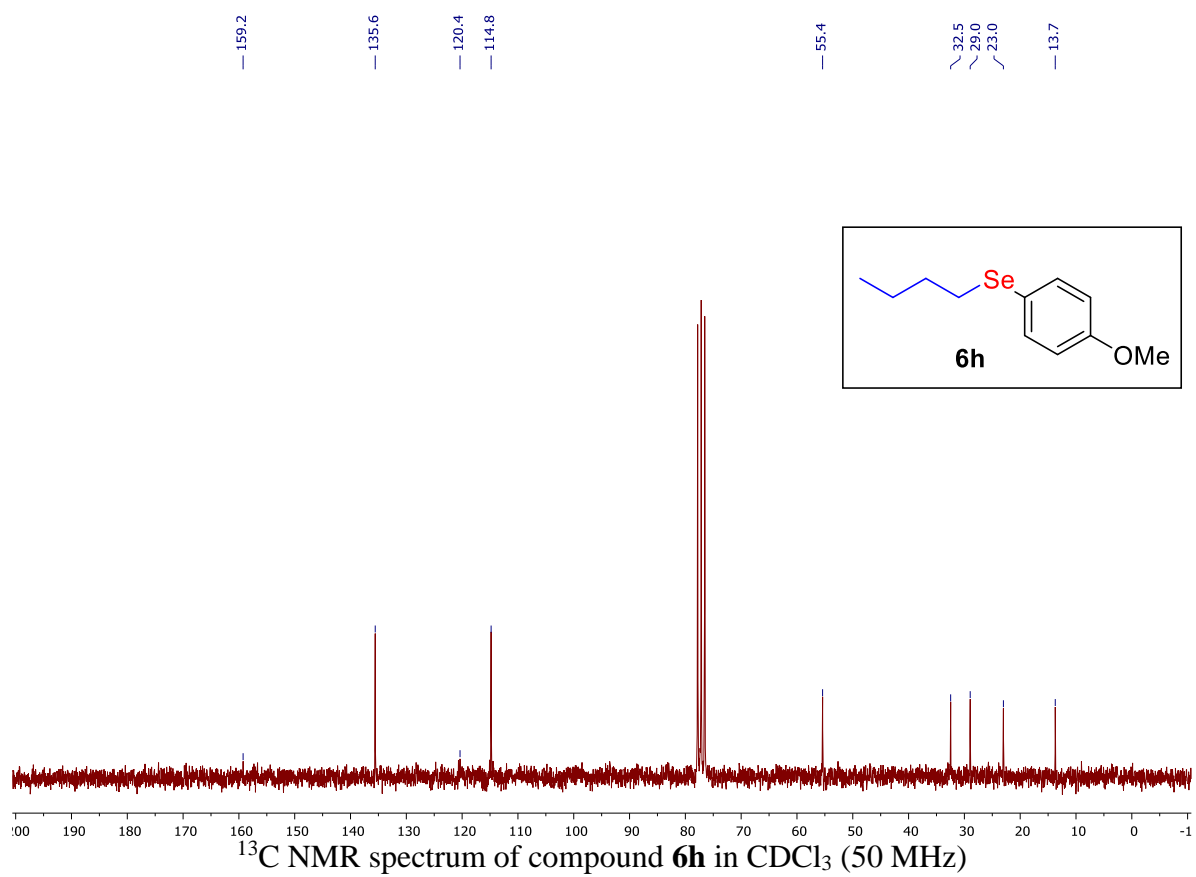

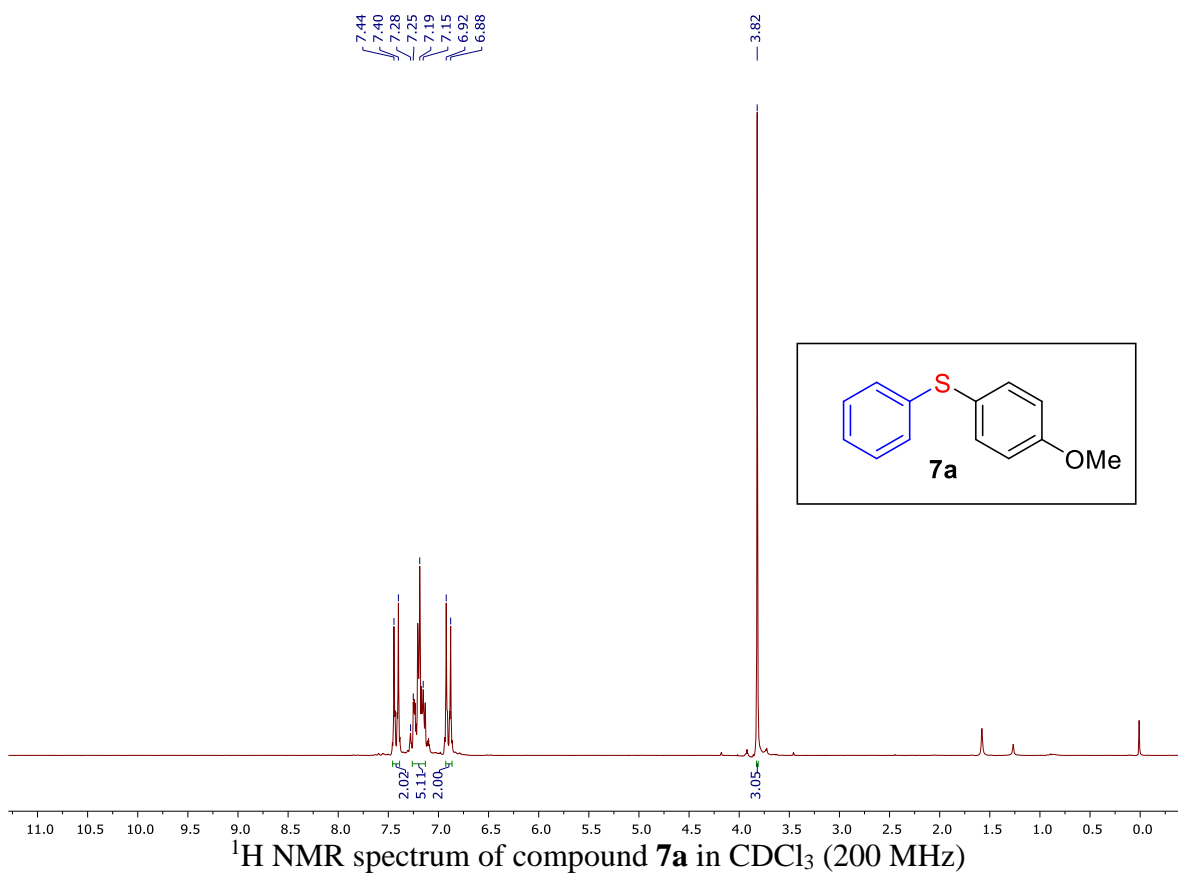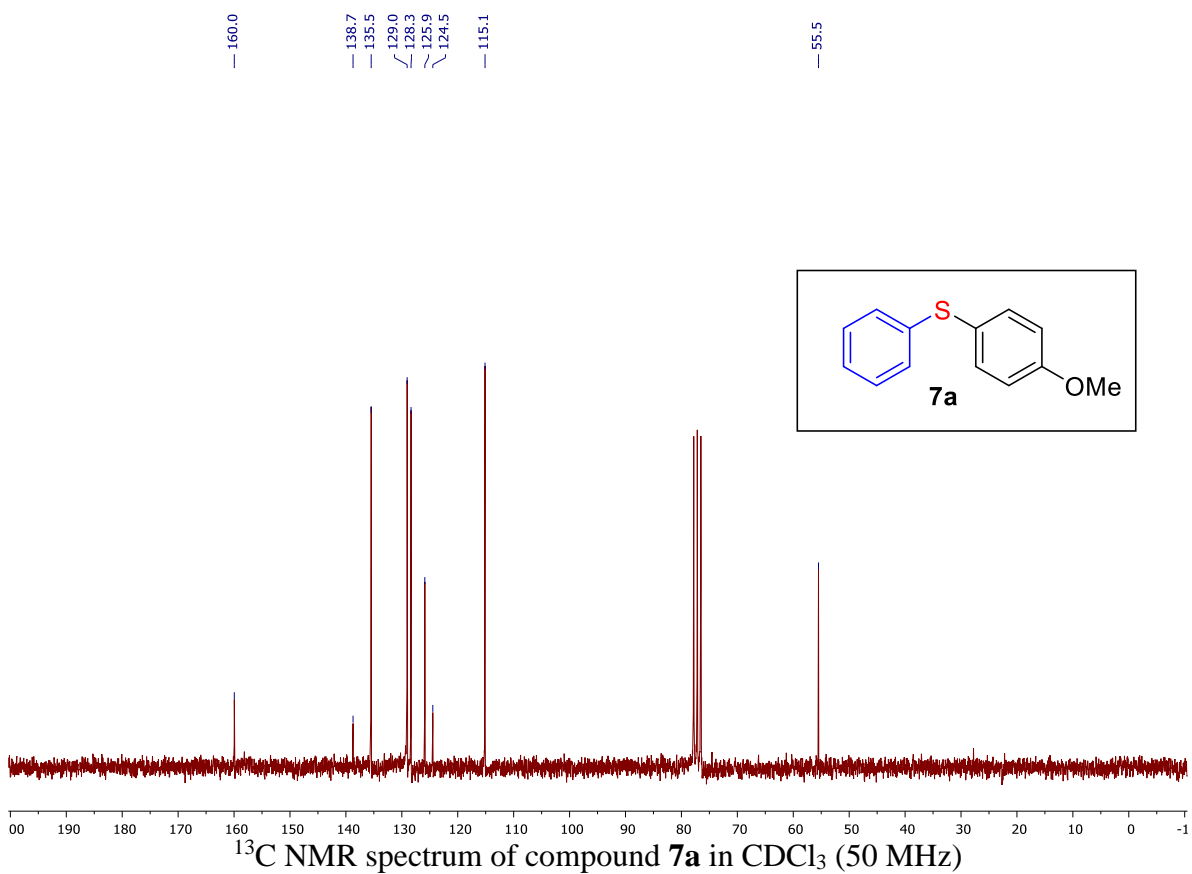

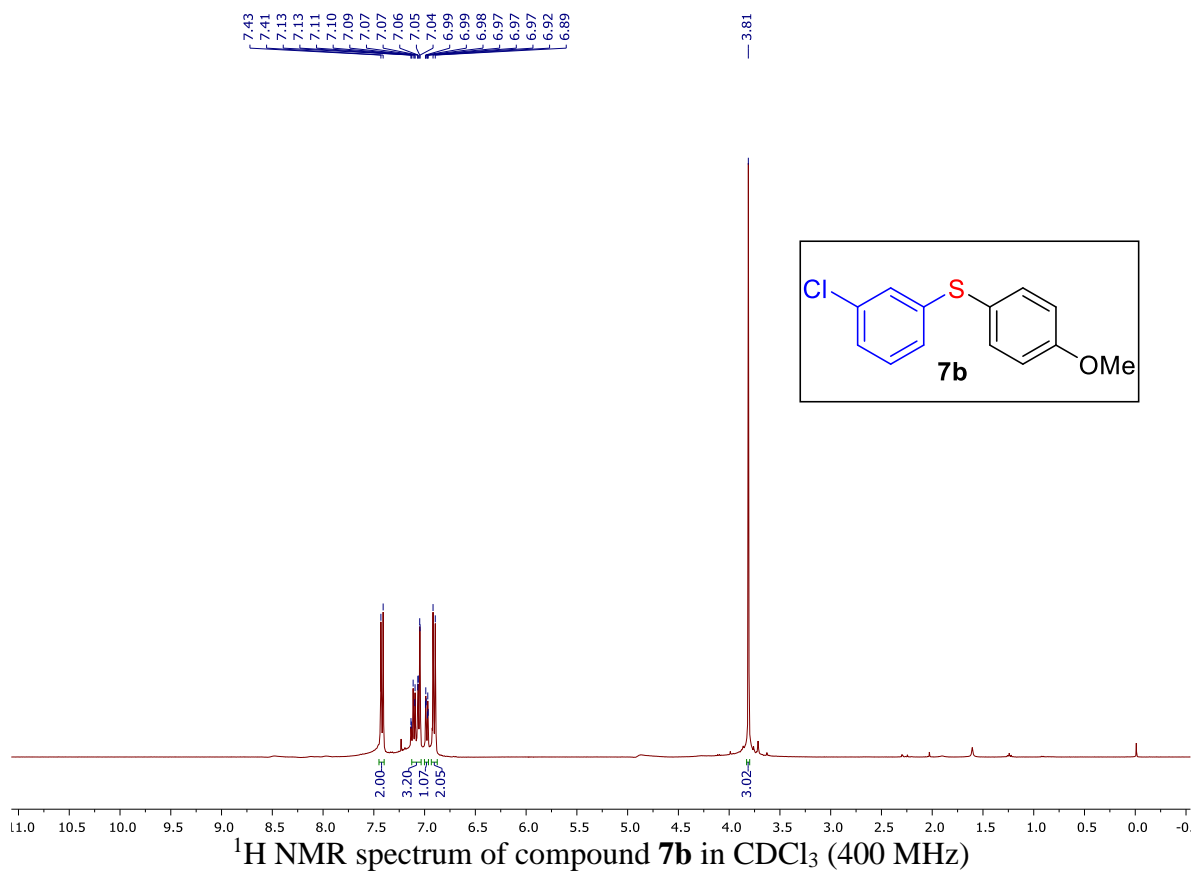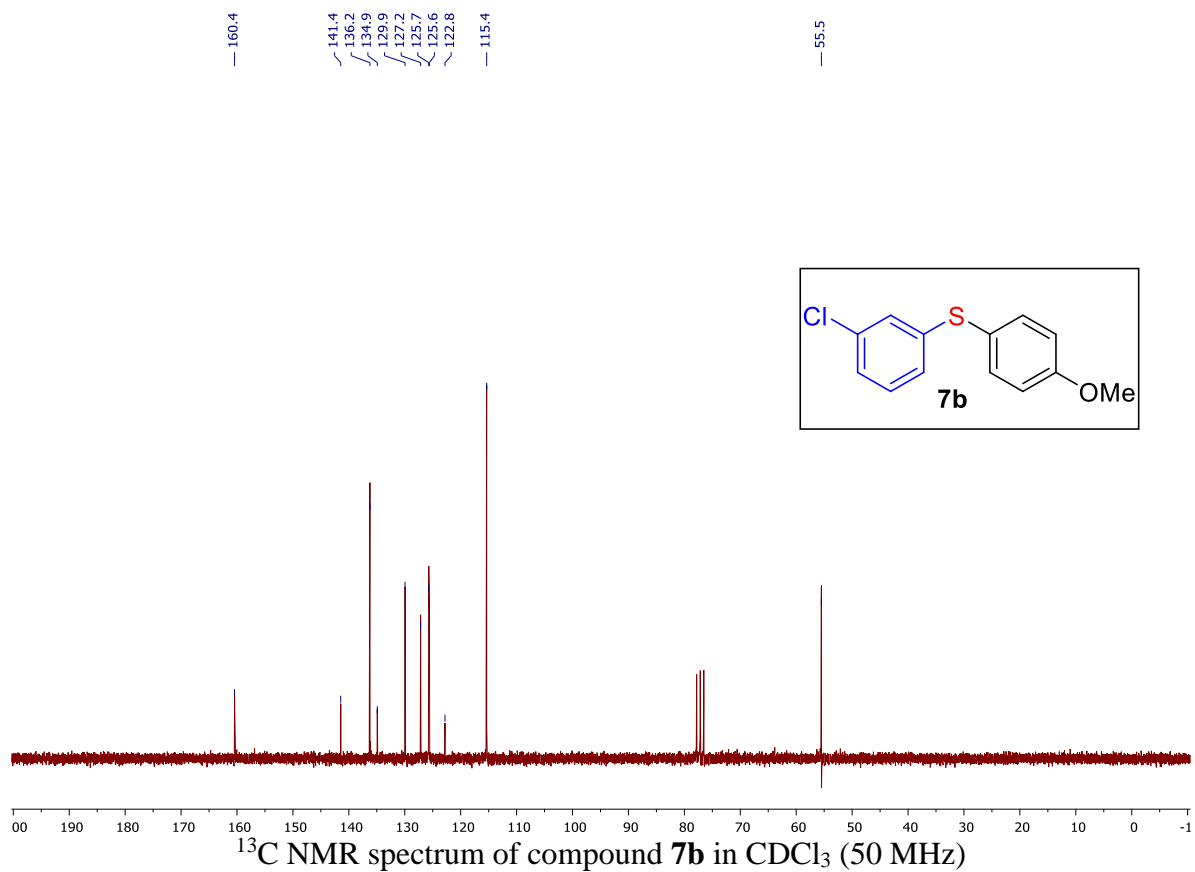

Supplement: molecules-22-01367-s001.pdf [file molecules-22-01367-s001.pdf]
